# Supplementary material for: The development of thymol–isatin hybrids as broad-spectrum antibacterial agents with potent anti-MRSA activity
Source: Royal Society of Chemistry journal article supplement (doi:10.1039/d3md00580a), 2023-11-20

## **Development of thymol-isatin hybrids as broad-spectrum antibacterial agents with potent anti-MRSA activity**

Atamjit Singh<sup>1,\*</sup>, Kirandeep Kaur<sup>1</sup>, Pallvi Mohana<sup>2</sup>, Karanvir Singh<sup>1</sup>, Aman Sharma<sup>1</sup>, Jignesh Prajapati<sup>3</sup>, Dweipayan Goswami<sup>3</sup>, Neha Khosla<sup>4</sup>, Uttam Kaur<sup>5</sup>, Rajanbir Kaur<sup>2</sup>, Rajinder Kaur<sup>2</sup>, Abhineet Rana<sup>6</sup>, Sandeep Kour<sup>7</sup>, Puja Ohri<sup>7</sup>, Saroj Arora<sup>2</sup>, Renu Chadha<sup>8</sup>, Preet Mohinder Singh Bedi<sup>1,9\*</sup>

<sup>1</sup>*Department of Pharmaceutical Sciences, Guru Nanak Dev University, Amritsar, Punjab 143005, India*

<sup>2</sup>*Department of Botanical and Environmental Sciences, Guru Nanak Dev University, Amritsar, Punjab 143005, India*

<sup>3</sup>*Department of Microbiology & Biotechnology, University School of Sciences, Gujrat University, Ahmedabad, Gujrat 380009, India*

<sup>4</sup>*Department of Molecular Biology and Biochemistry, Guru Nanak Dev University, Amritsar, Punjab, 143005, India*

<sup>5</sup>*University School of Business Management, Chandigarh University, Gharuan 140413, India*

<sup>6</sup>*EMC super speciality Hospital, Amritsar, Punjab, 143005, India*

<sup>7</sup>*Department of Zoology, Guru Nanak Dev University, Amritsar, Punjab, 143005, India*

<sup>8</sup>*University Institute of Pharmaceutical Sciences, Punjab University, Chandigarh 160014, India*

<sup>9</sup>*Drug and Pollution testing Laboratory, Guru Nanak Dev University, Amritsar, Punjab 143005, India*

\*Corresponding authors:

1. Atamjit Singh

Department of Pharmaceutical Sciences, Guru Nanak Dev University, Amritsar, Punjab  
143005, India

Email id: [atampanesar@gmail.com](mailto:atampanesar@gmail.com), [atamjitpharma.rsh@gndu.ac.in](mailto:atamjitpharma.rsh@gndu.ac.in)

2. Preet Mohinder Singh Bedi

Department of Pharmaceutical Sciences, Guru Nanak Dev University, Amritsar, Punjab  
143005, India

Email id: [bedi\\_preet@yahoo.com](mailto:bedi_preet@yahoo.com), [preet.pharma@gndu.ac.in](mailto:preet.pharma@gndu.ac.in)

| <b>Contents</b>                                           | <b>Page numbers</b> |
|-----------------------------------------------------------|---------------------|
| $^1\text{H}$ and $^{13}\text{C}$ spectra of <b>8</b>      | 3-4                 |
| $^1\text{H}$ and $^{13}\text{C}$ spectra of <b>10</b>     | 5-6                 |
| $^1\text{H}$ and $^{13}\text{C}$ spectra of <b>AS1-21</b> | 7-48                |

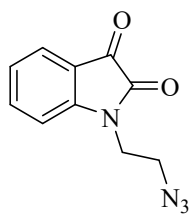

### <sup>1</sup>H Spectrum of **8**

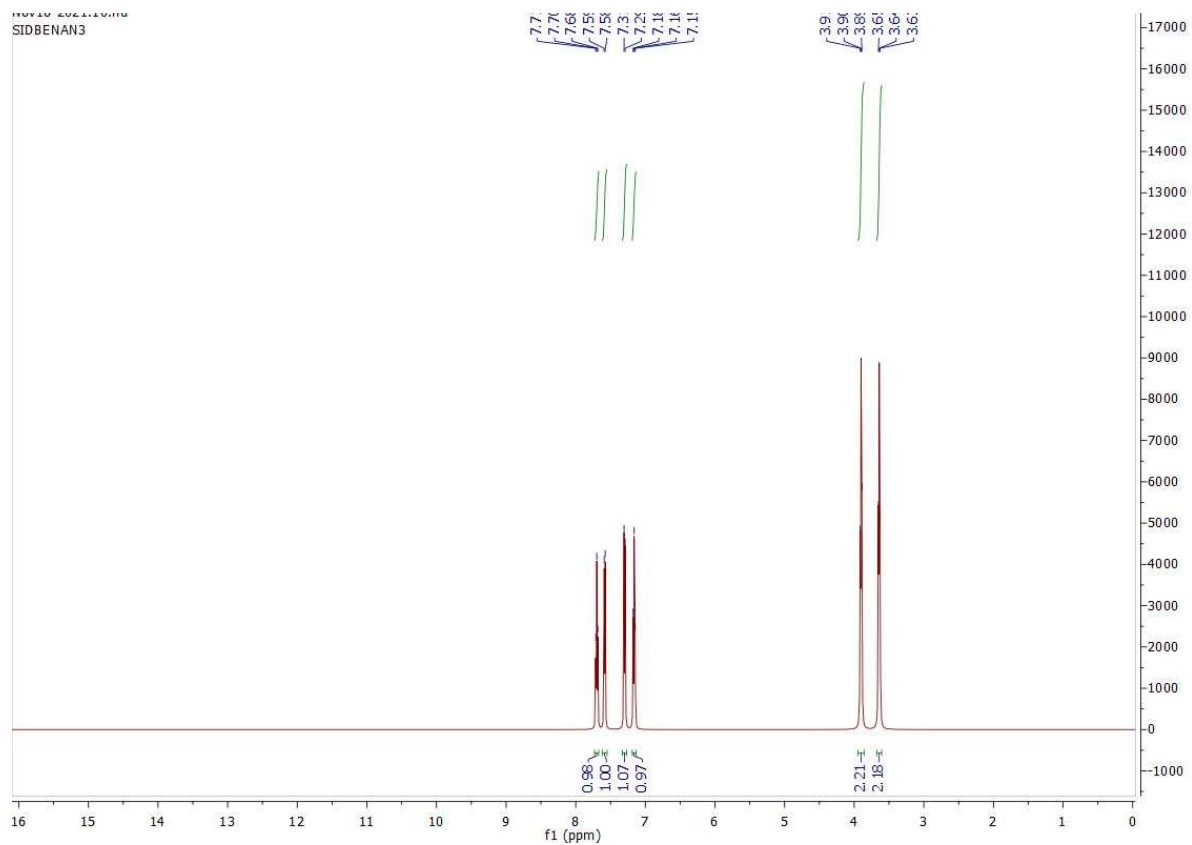

# <sup>13</sup>C Spectrum of **8**

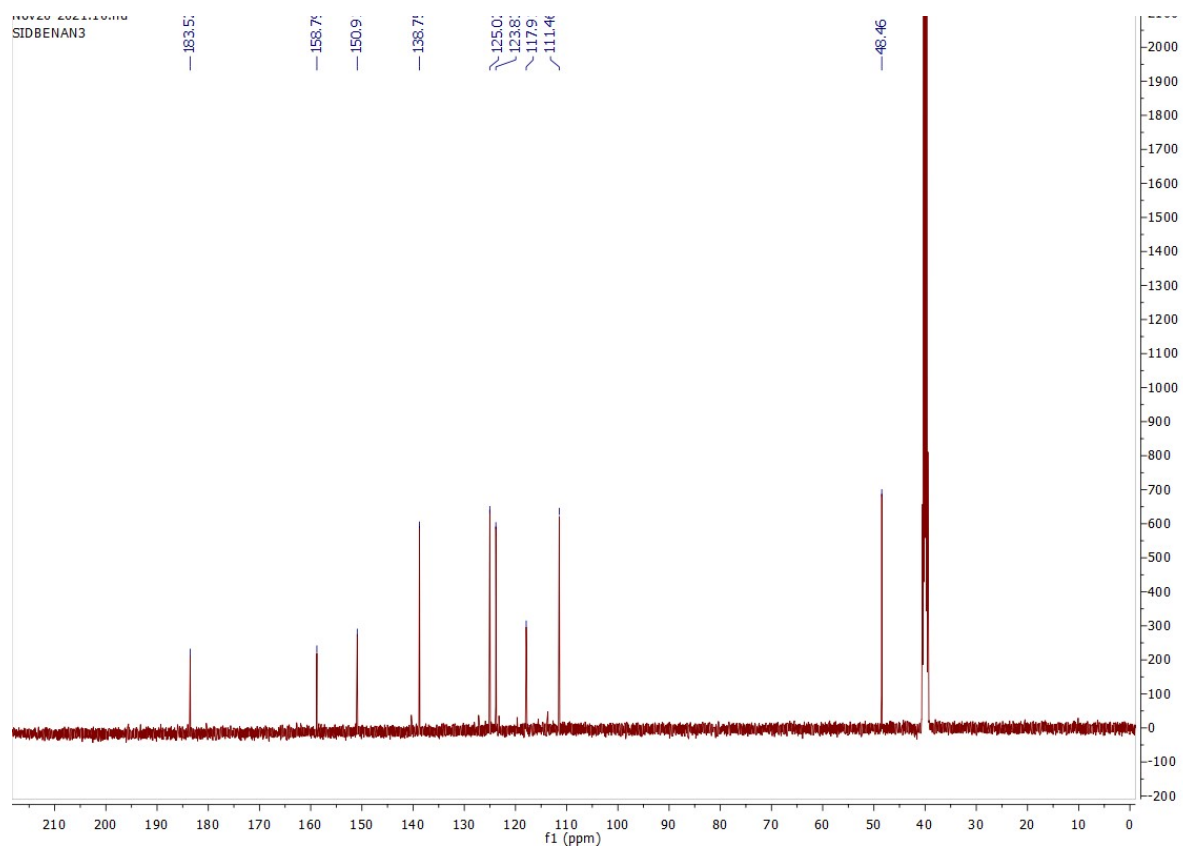

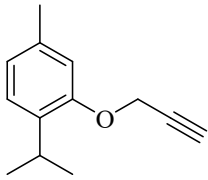

# <sup>1</sup>H Spectrum of 10

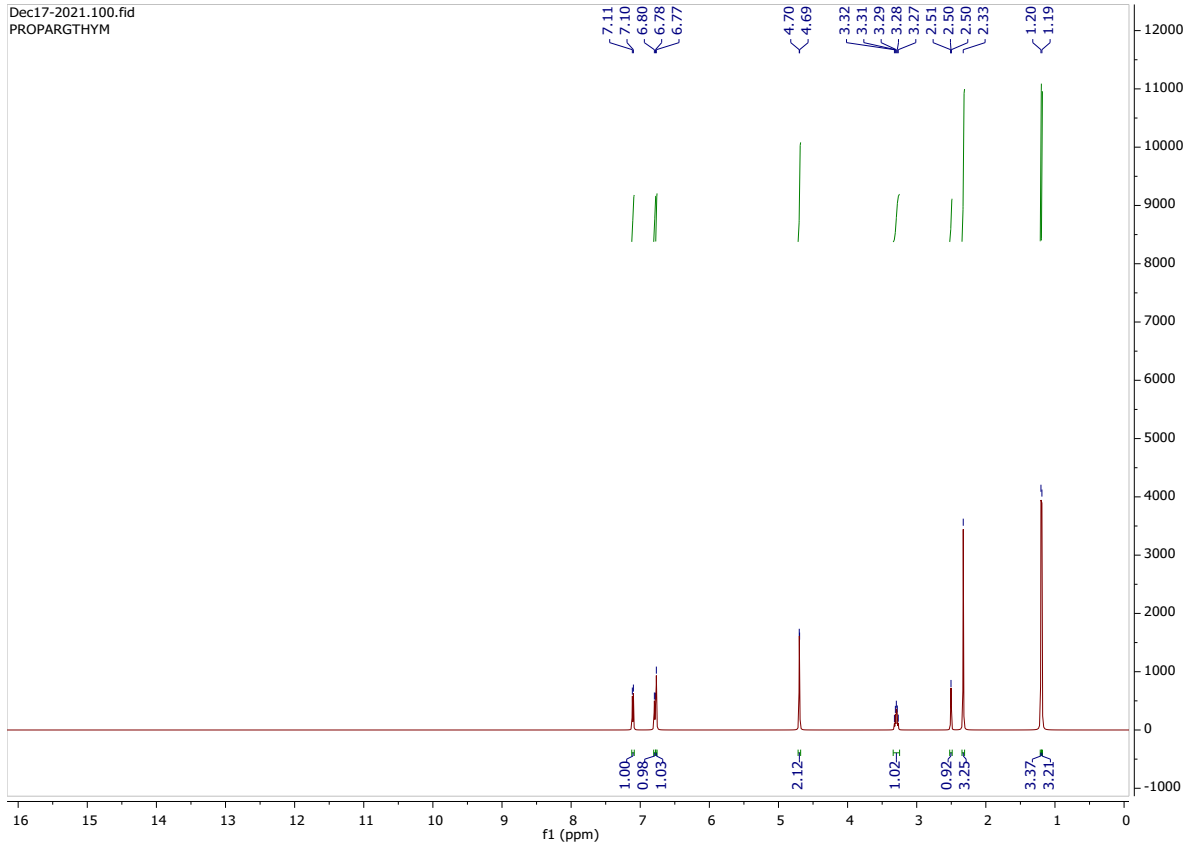

# <sup>13</sup>C NMR spectrum of 10

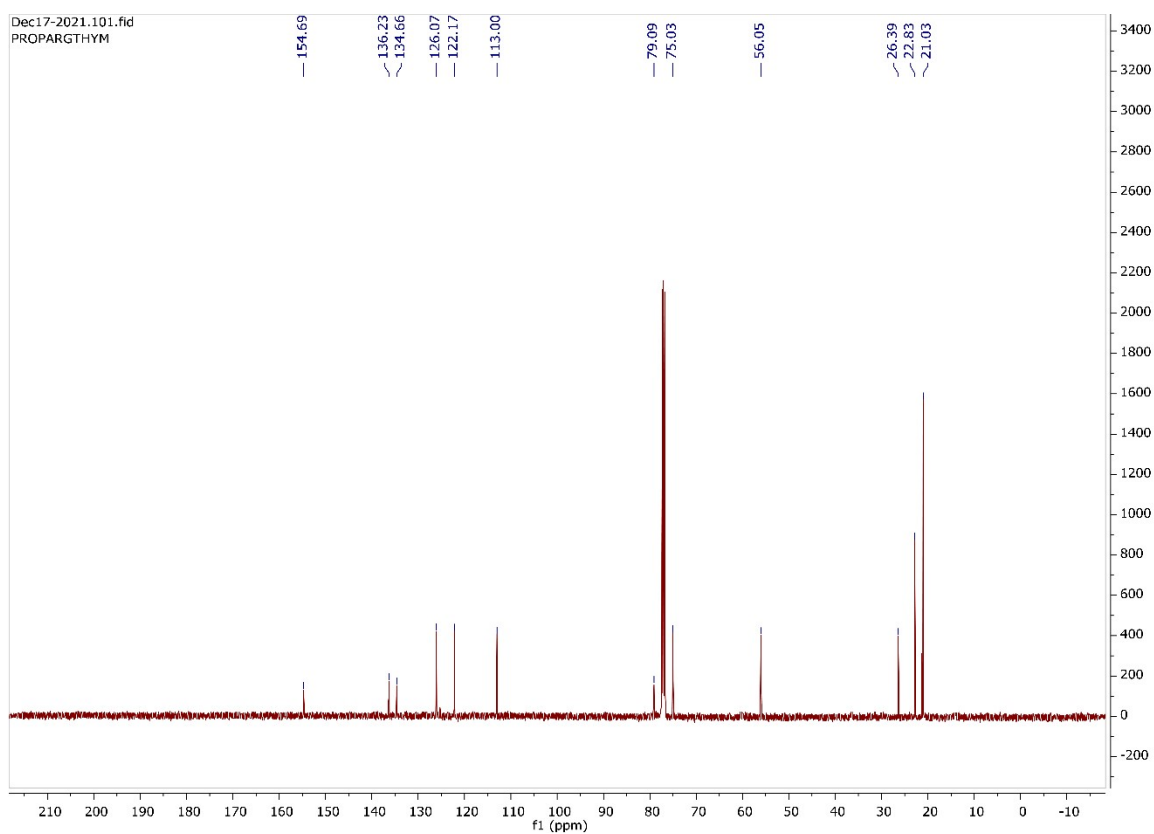

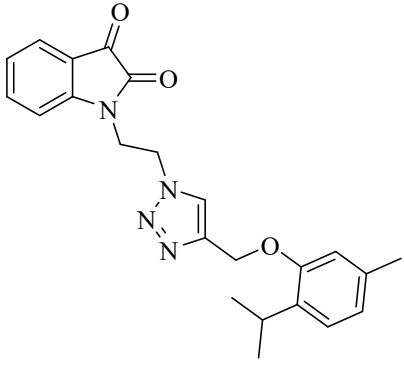

<sup>1</sup>H NMR spectrum of AS1

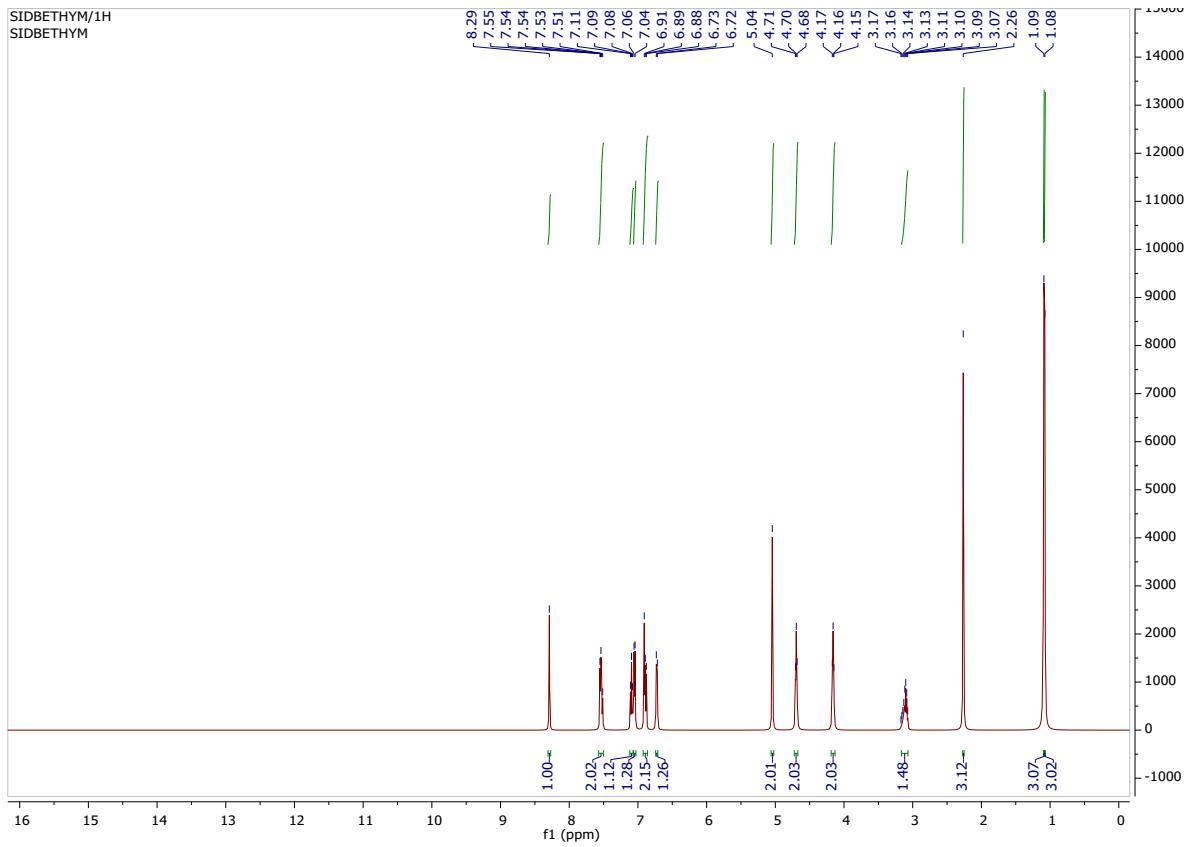

# $^{13}\text{C}$ NMR spectrum of AS1

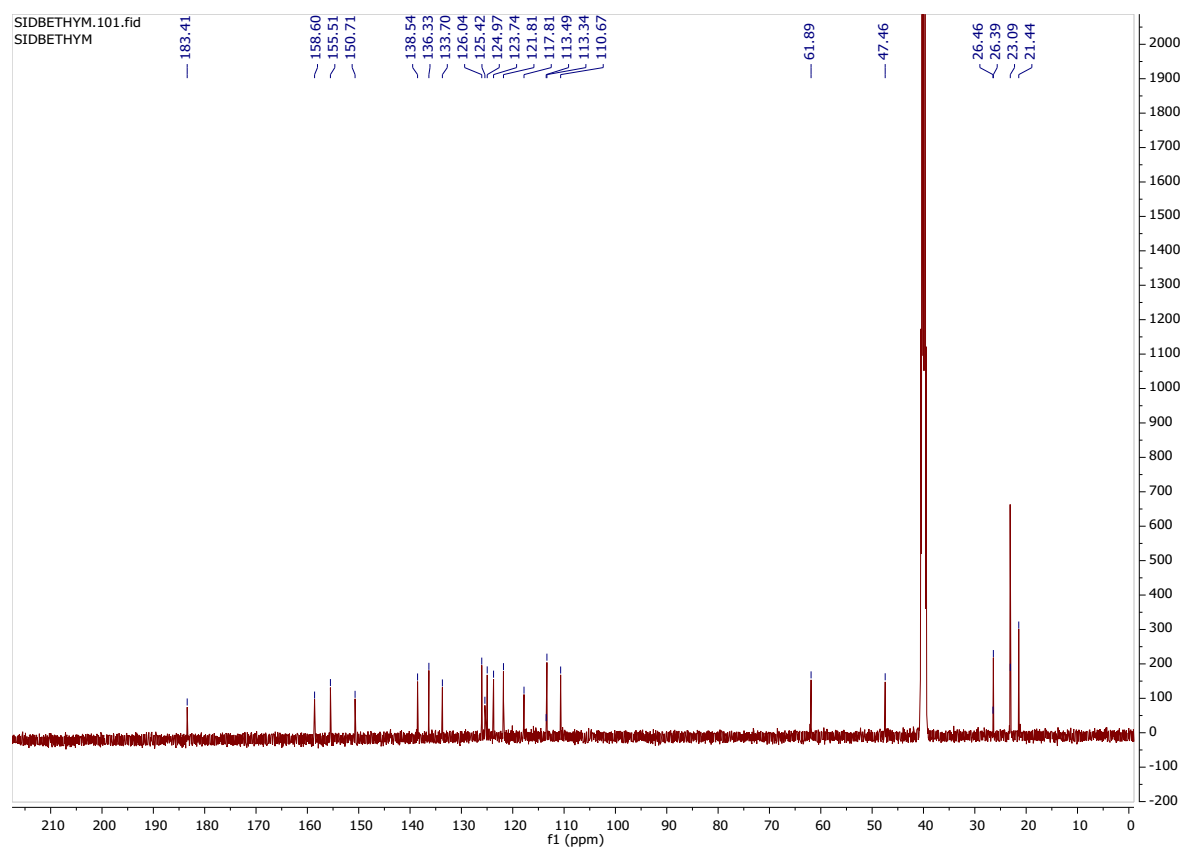



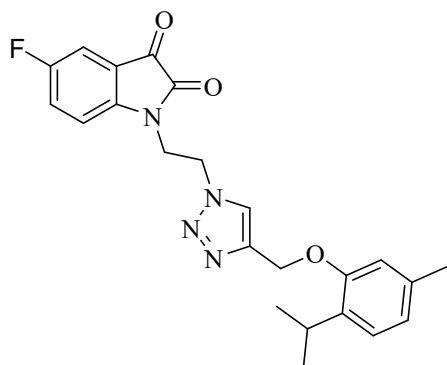

<sup>1</sup>H NMR spectrum of AS2

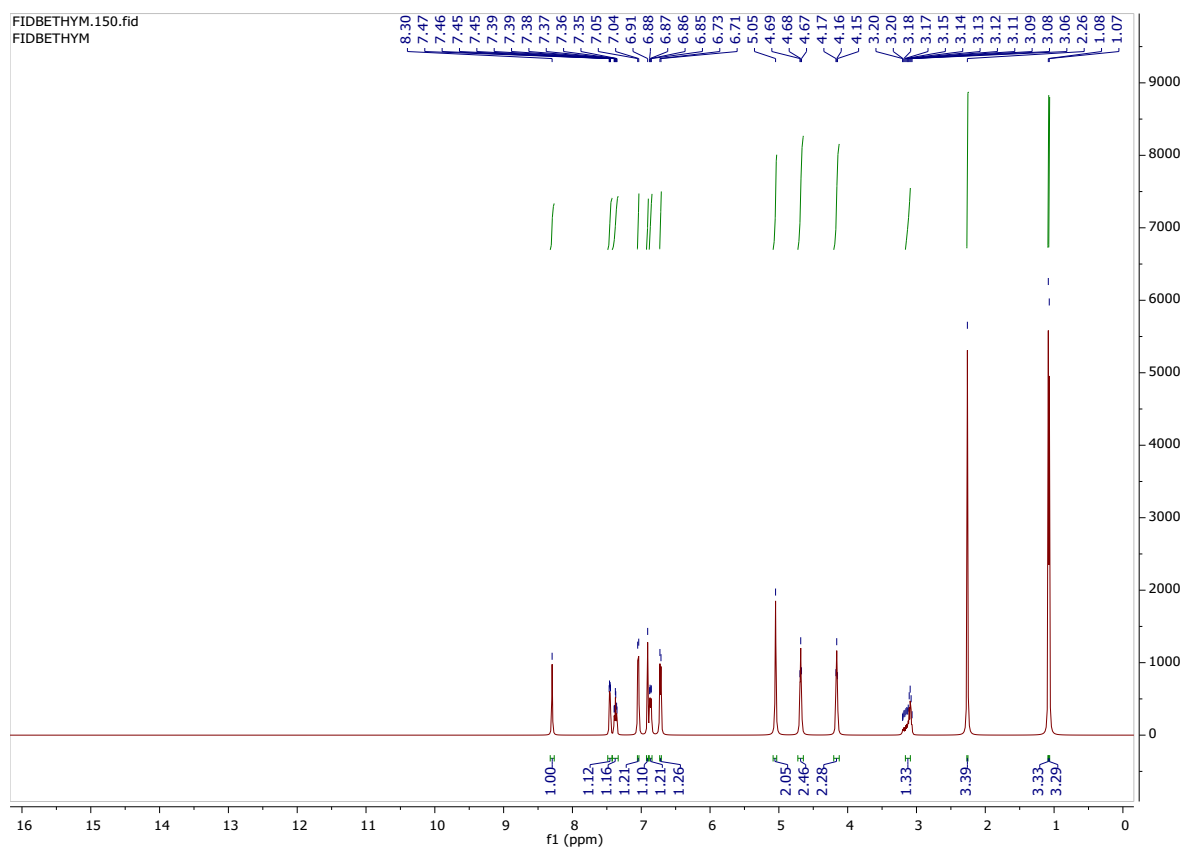

# <sup>13</sup>C NMR spectrum of AS2

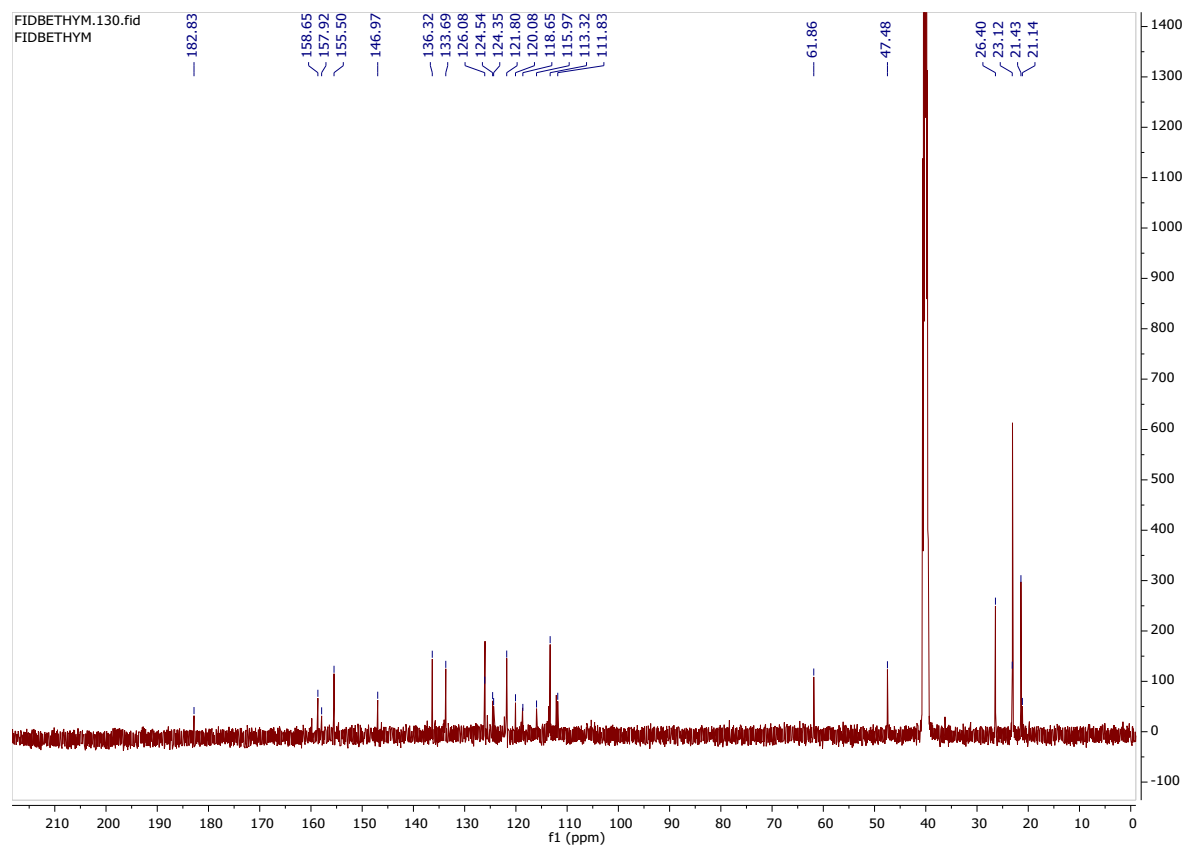

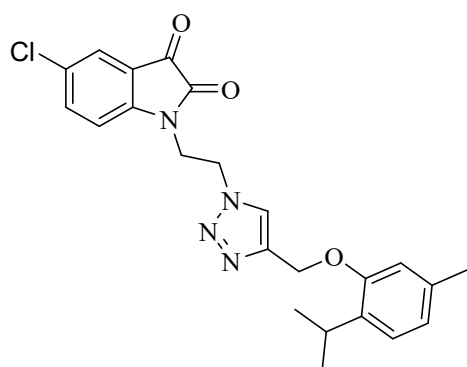

<sup>1</sup>H NMR spectrum of AS3

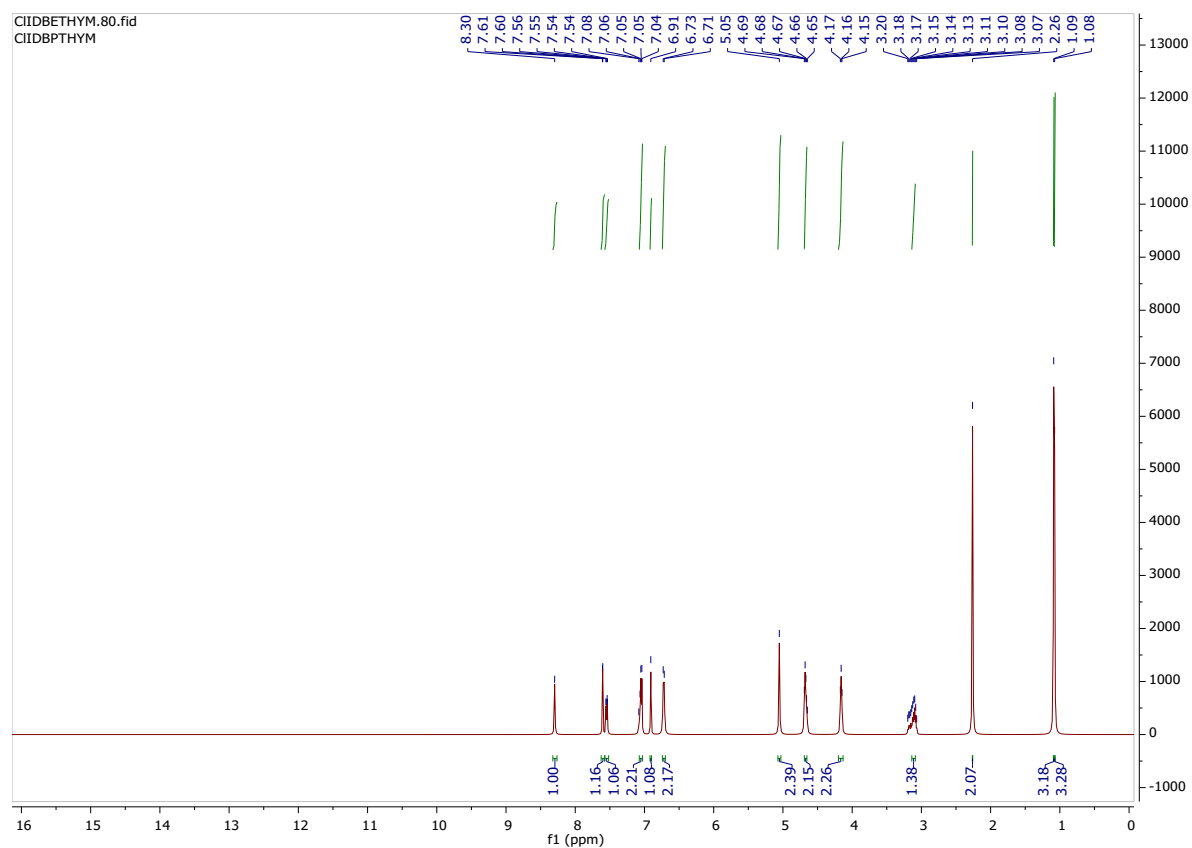

# <sup>13</sup>C NMR spectrum of AS3

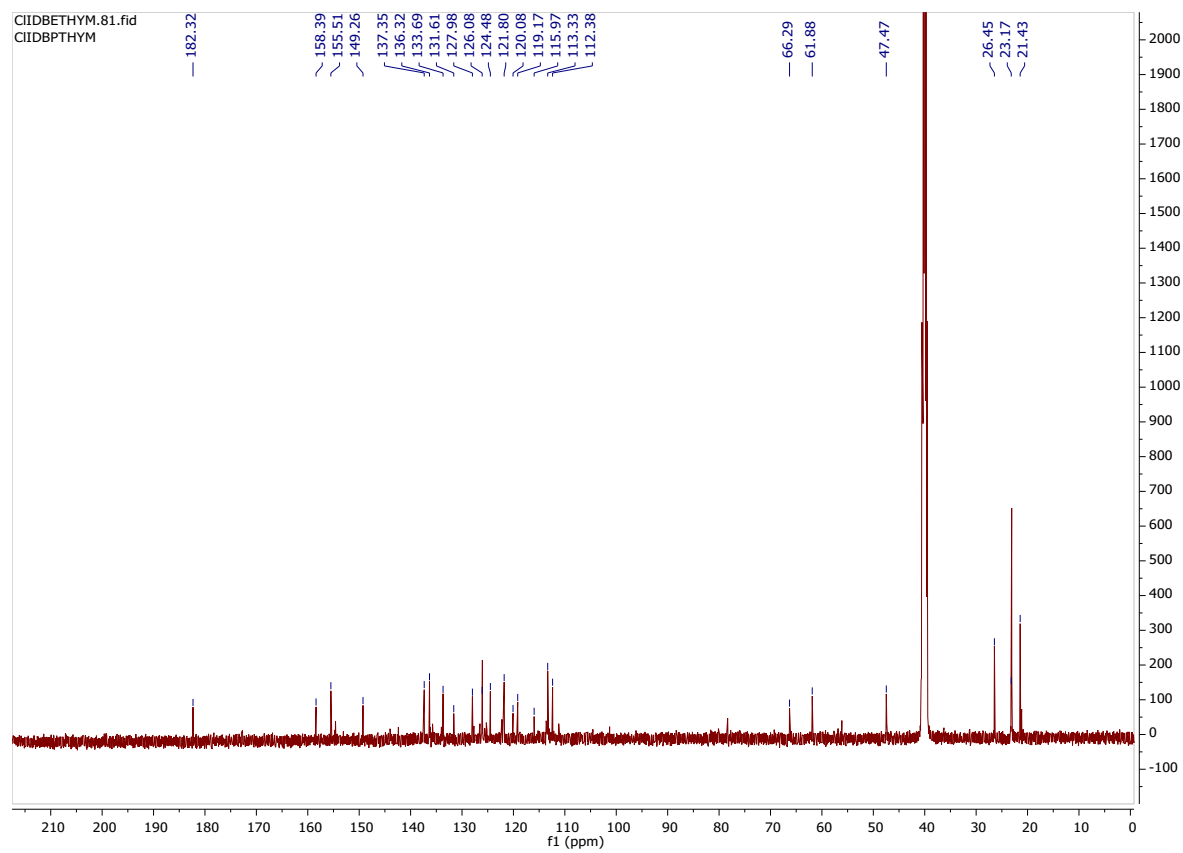

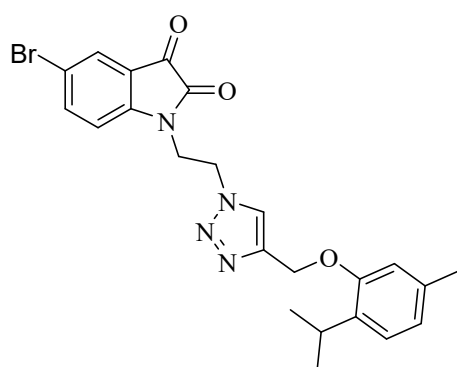

<sup>1</sup>H NMR spectrum of AS4

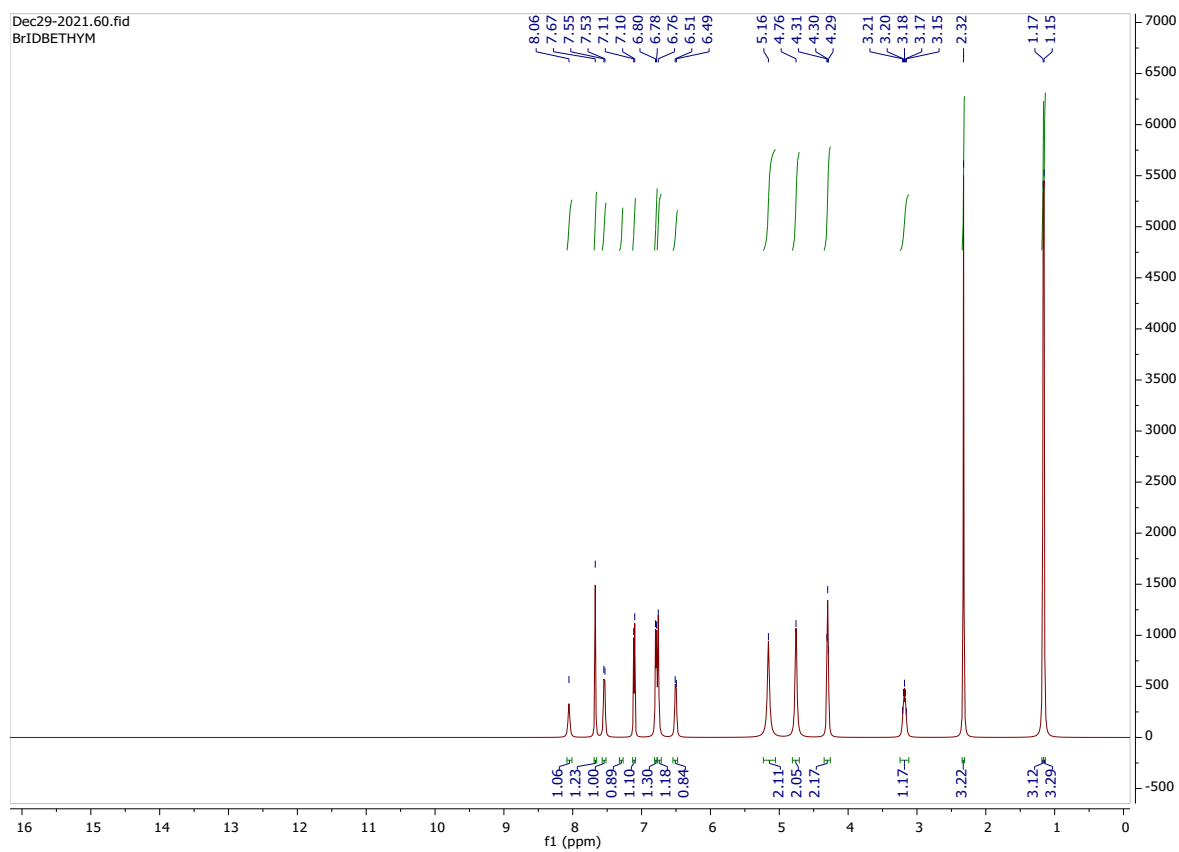

# <sup>13</sup>C NMR spectrum of AS4

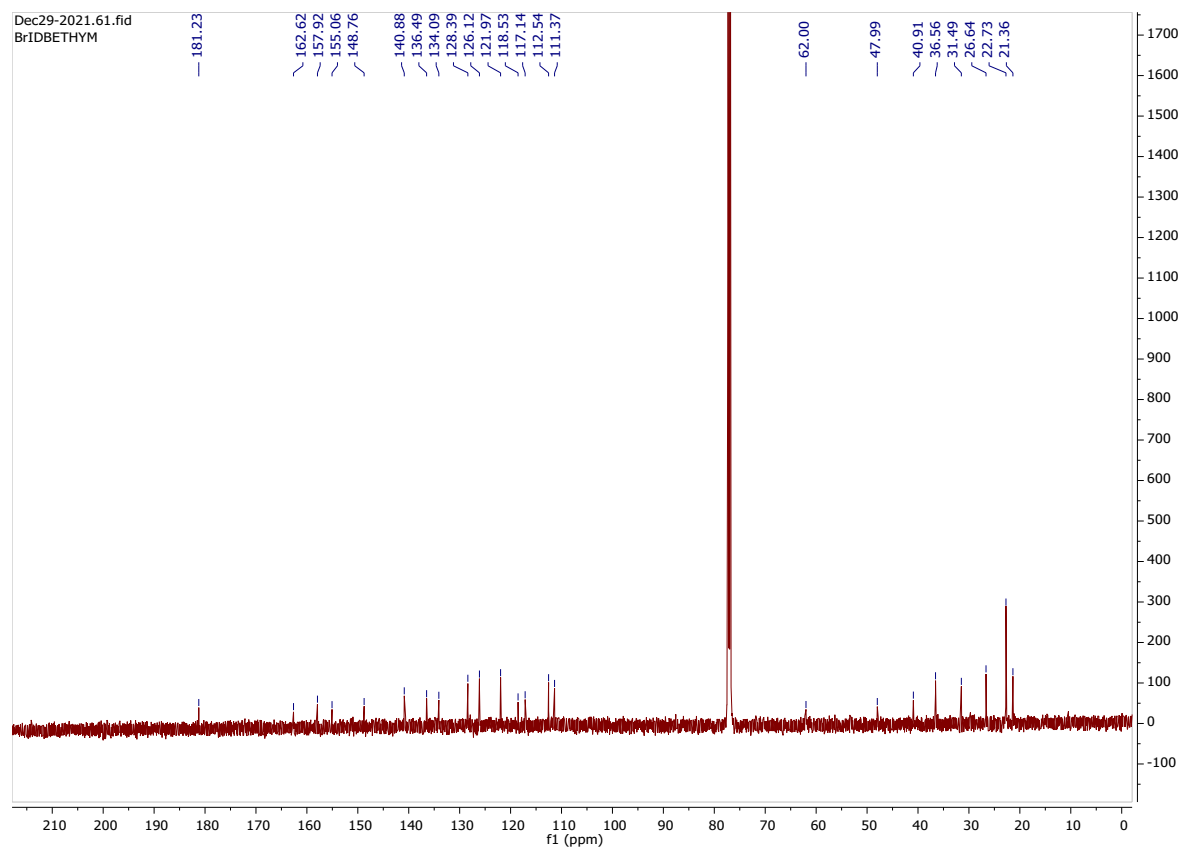

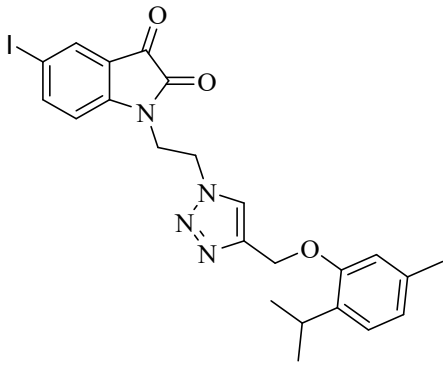

<sup>1</sup>H NMR spectrum of AS5

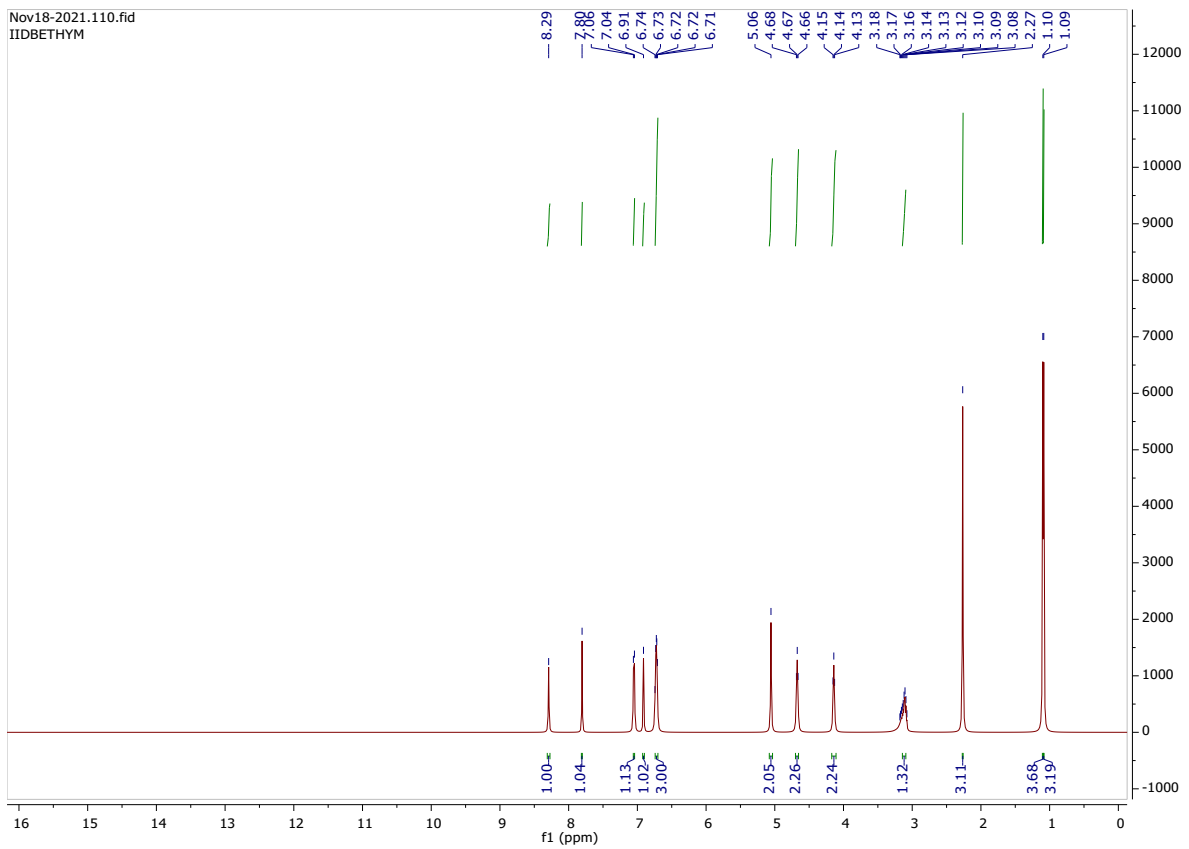

# <sup>13</sup>C NMR spectrum of AS5

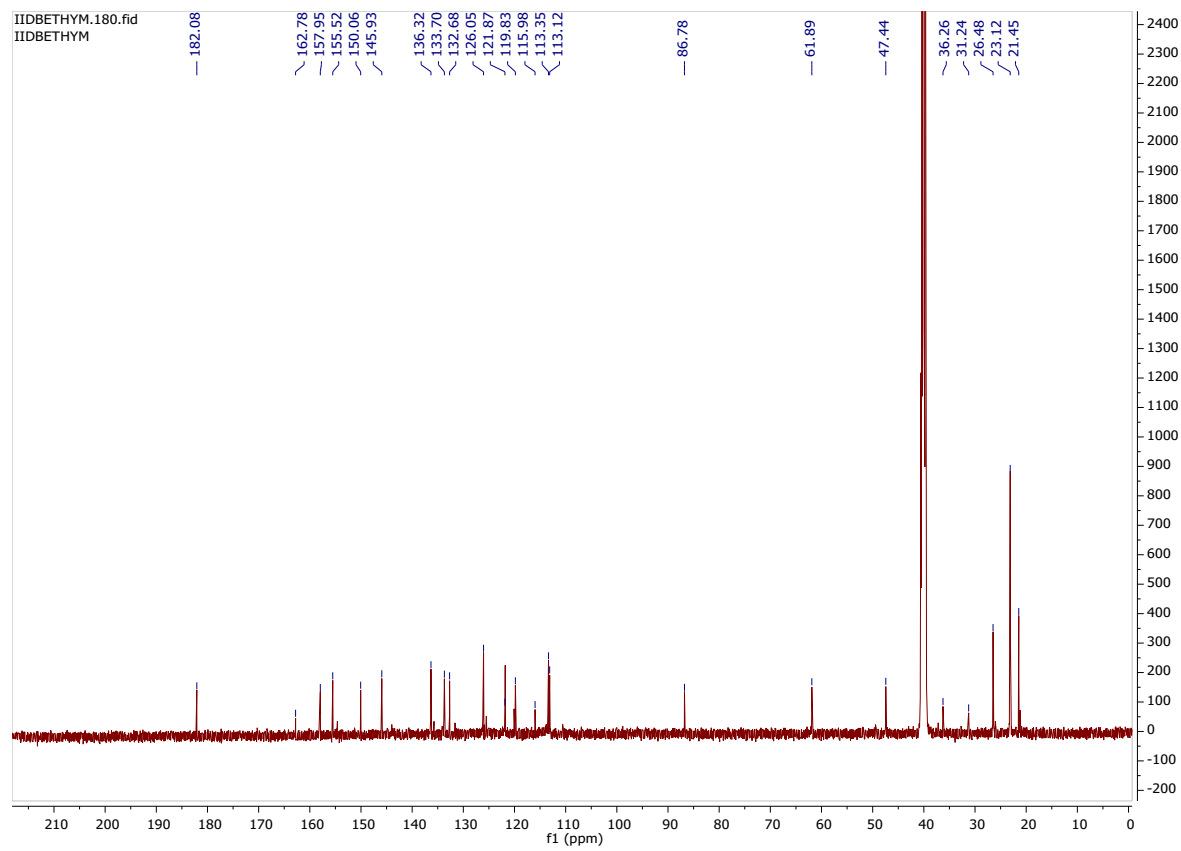



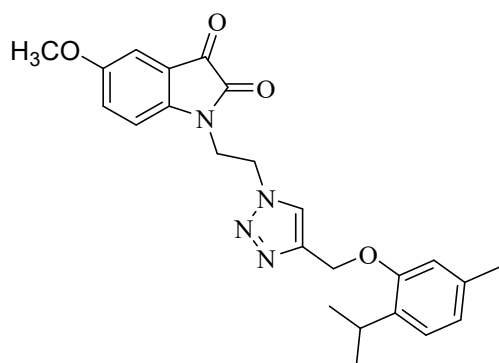

<sup>1</sup>H NMR spectrum of AS6

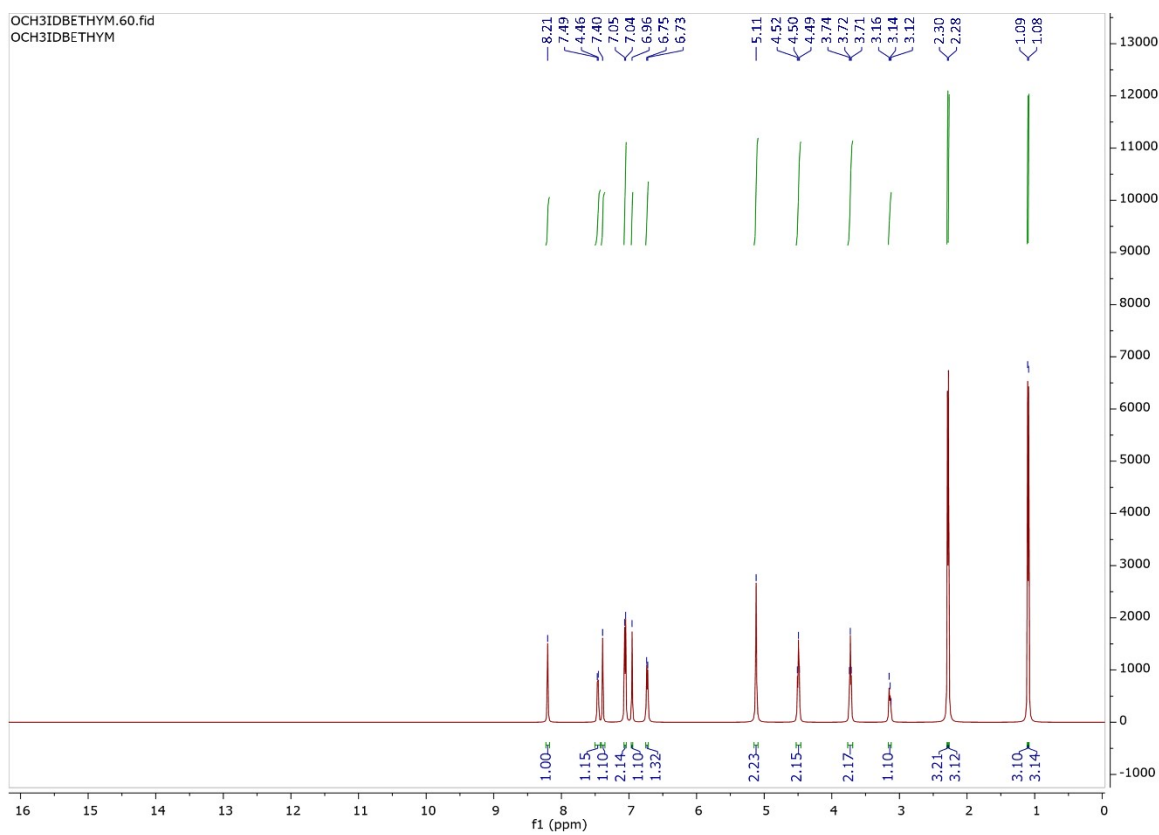

# <sup>13</sup>C NMR spectrum of AS6

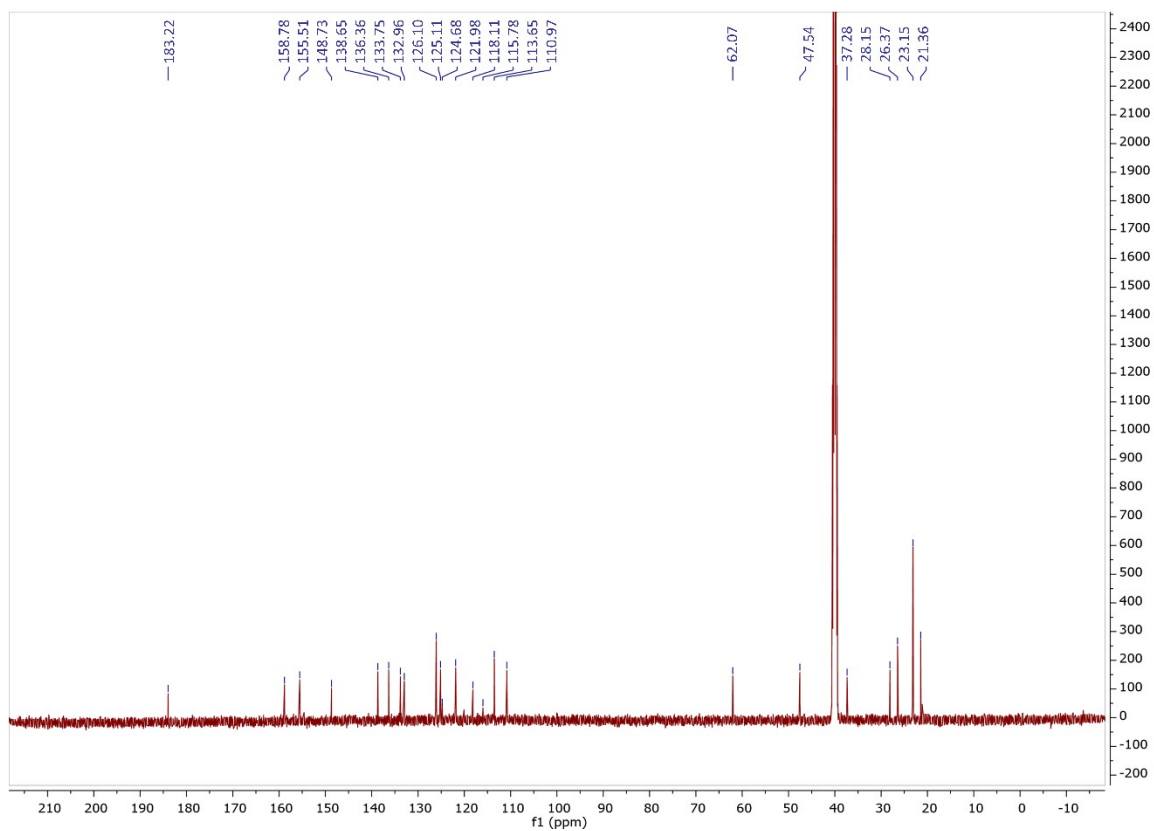

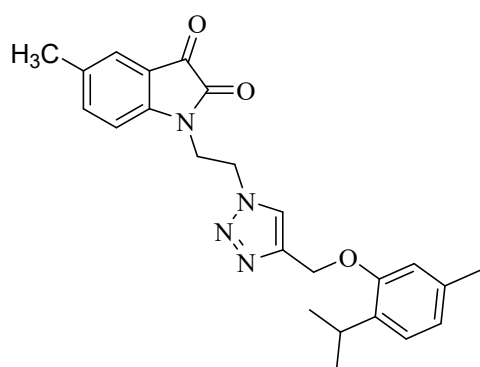

<sup>1</sup>H NMR spectrum of AS7

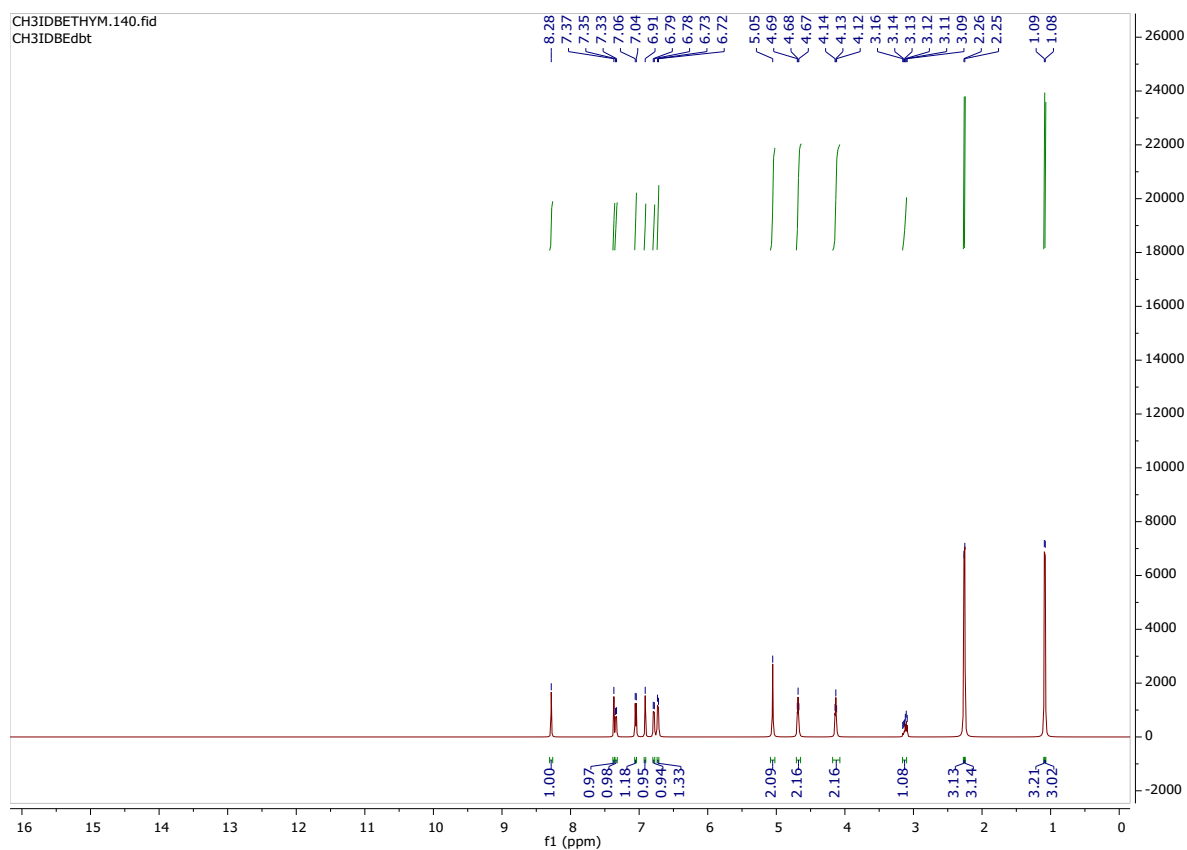

# <sup>13</sup>C NMR spectrum of AS7

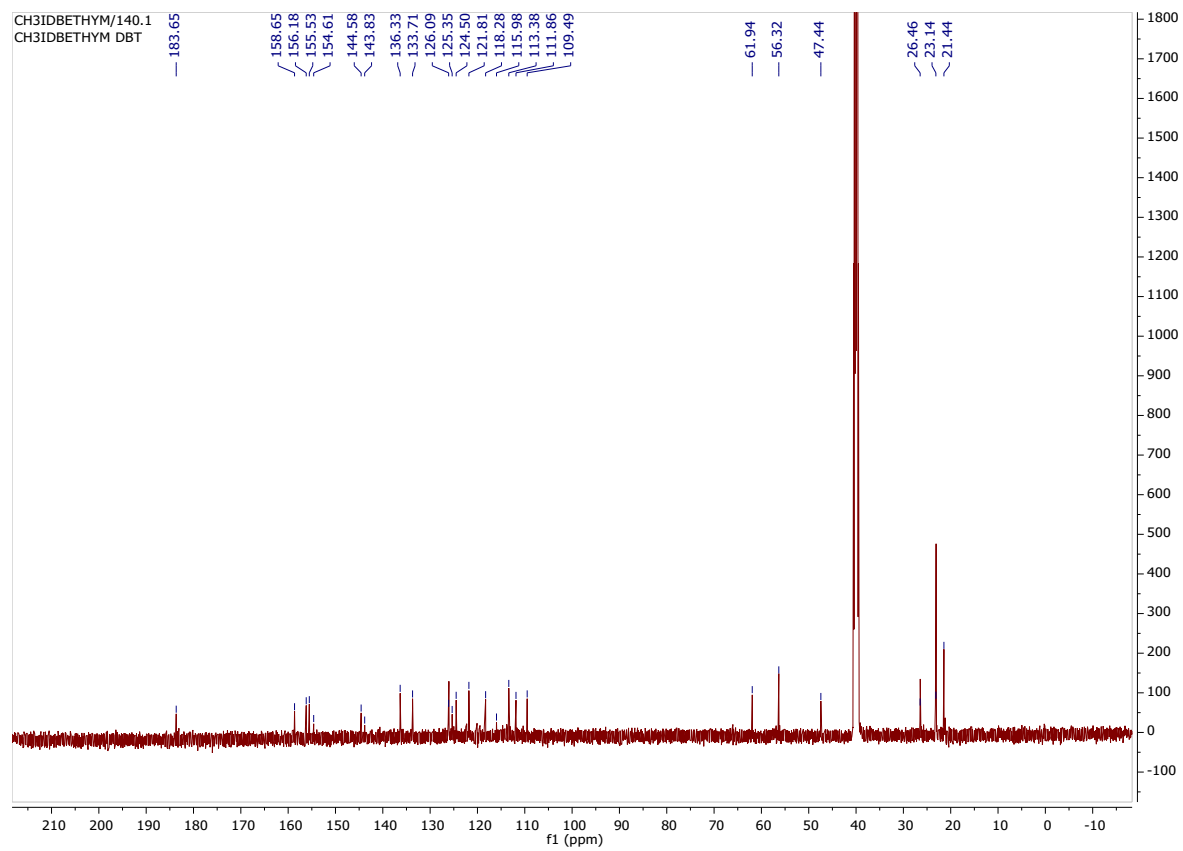

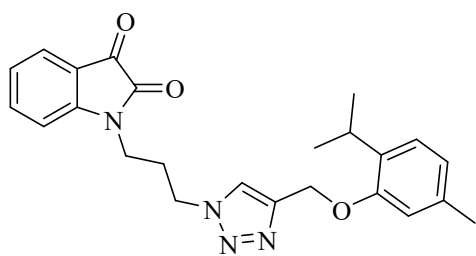

<sup>1</sup>H NMR spectrum of AS8

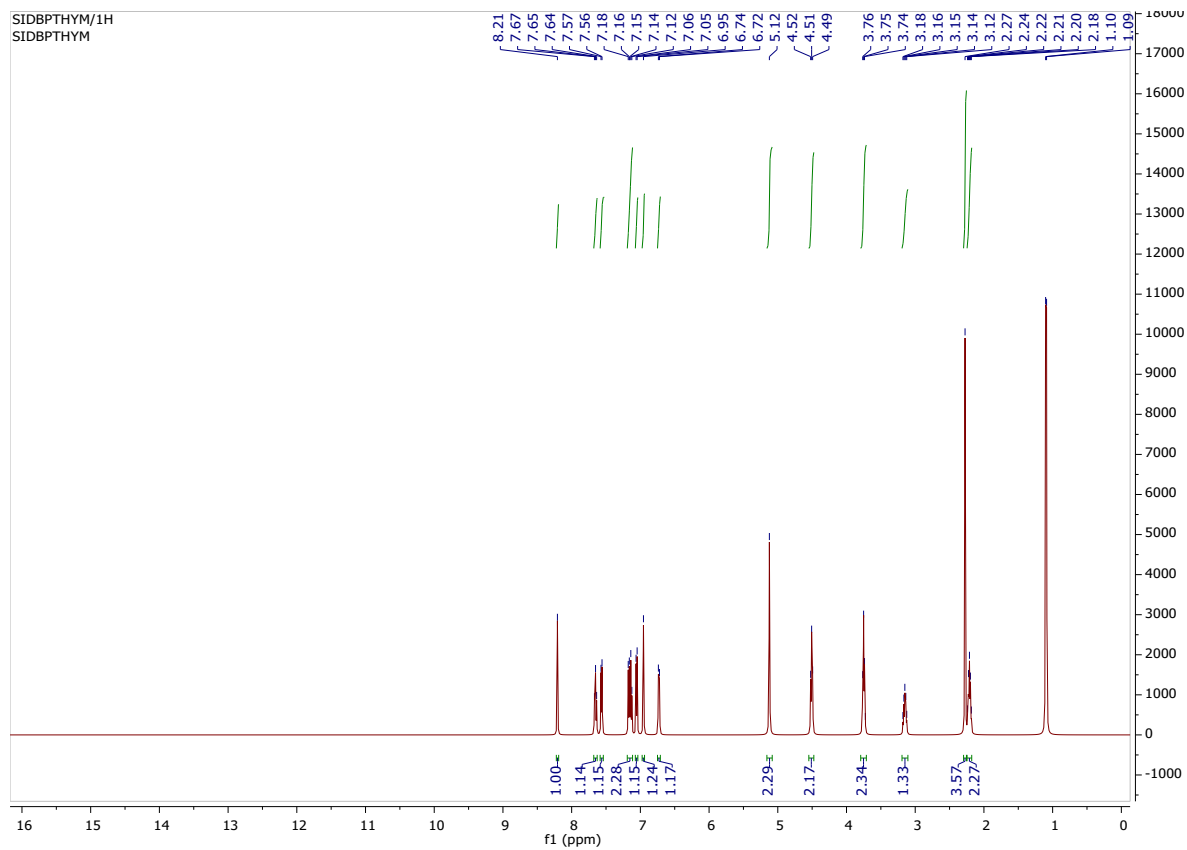

# <sup>13</sup>C NMR spectrum of AS8

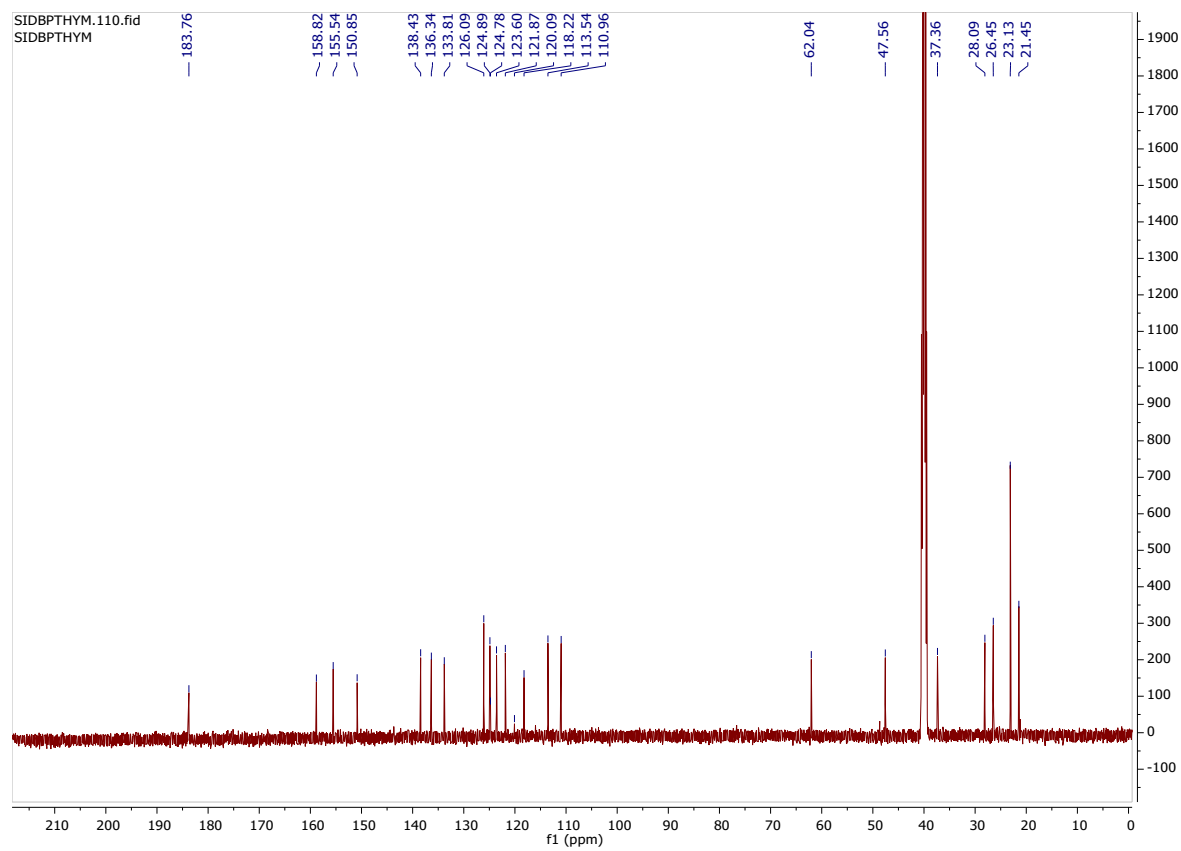

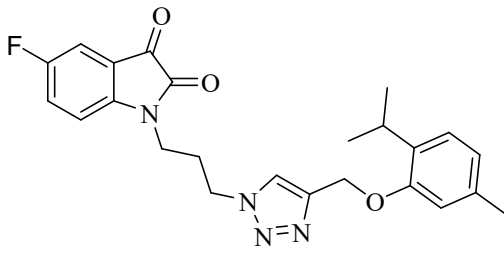

<sup>1</sup>H NMR spectrum of AS9

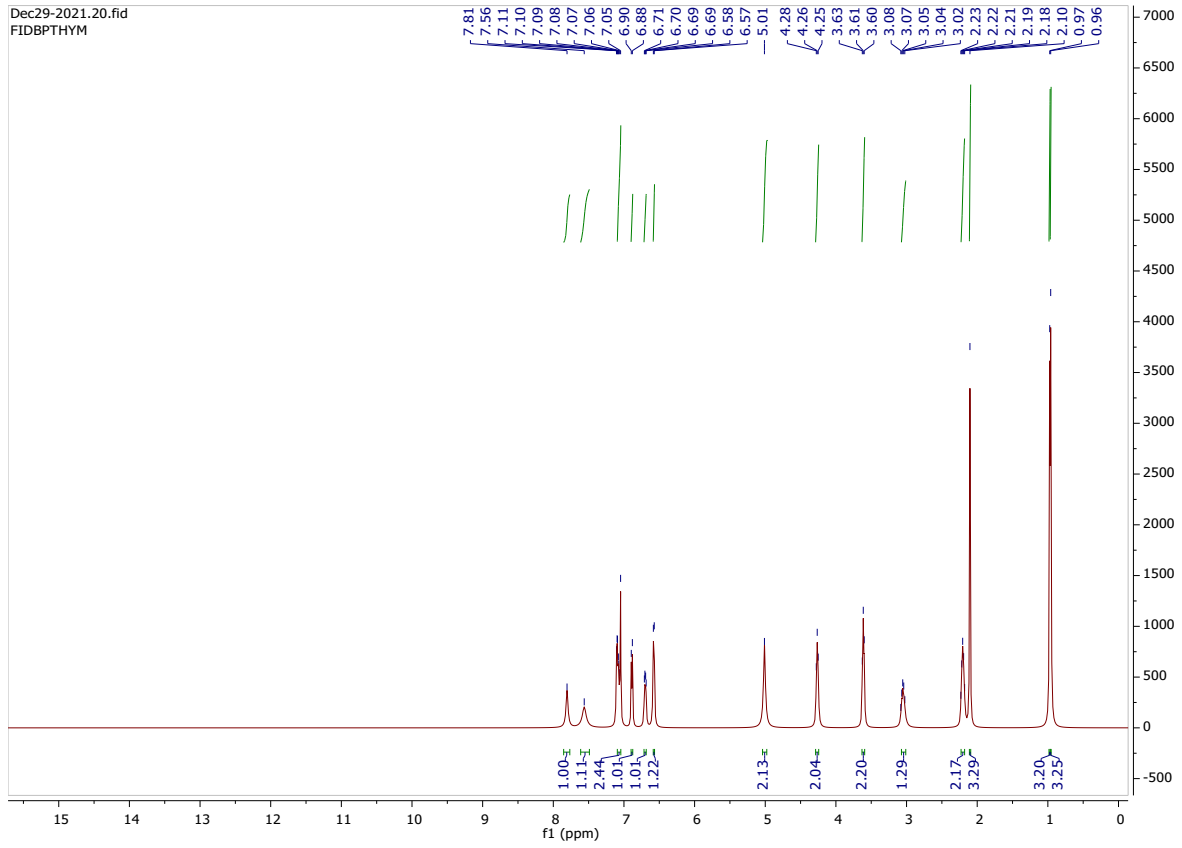

# <sup>13</sup>C NMR spectrum of AS9

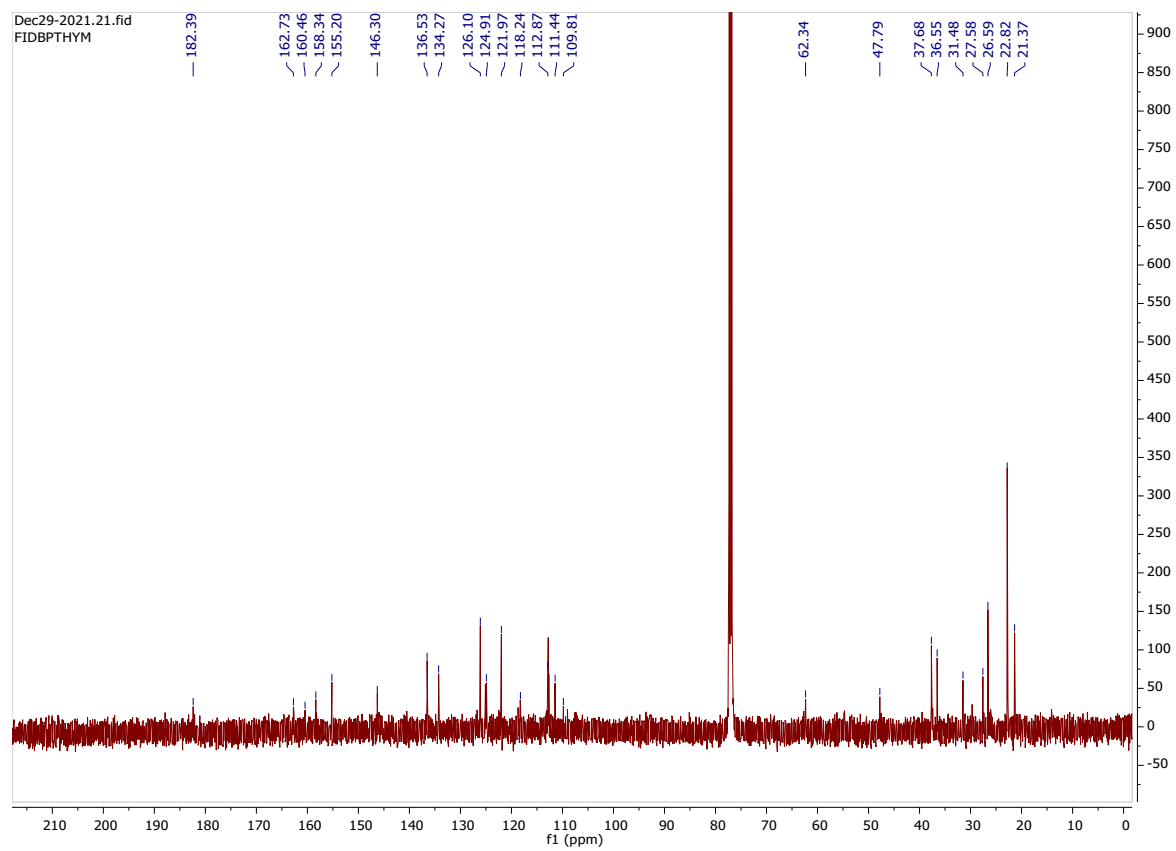



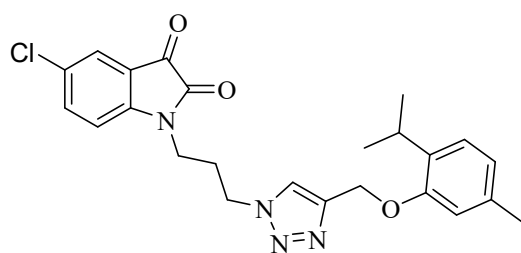

<sup>1</sup>H NMR spectrum of AS10

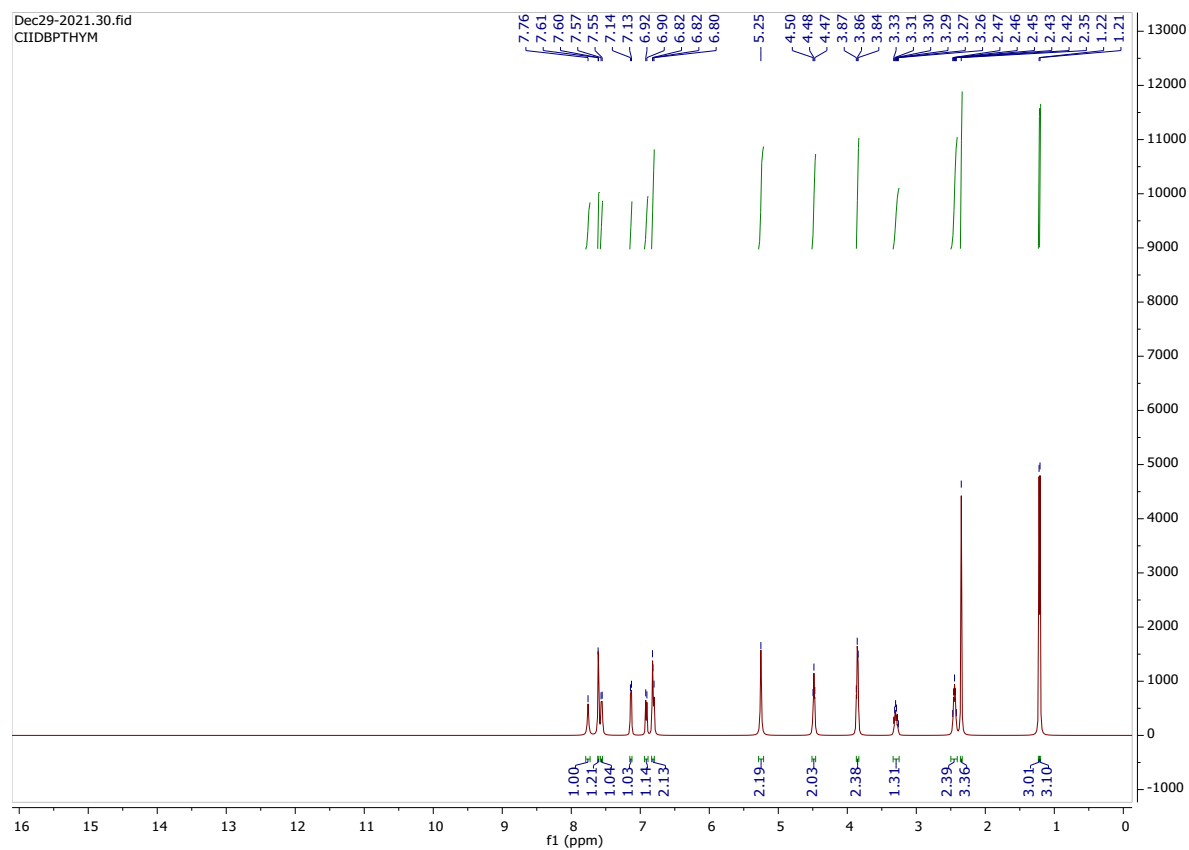

# <sup>13</sup>C NMR spectrum of AS10

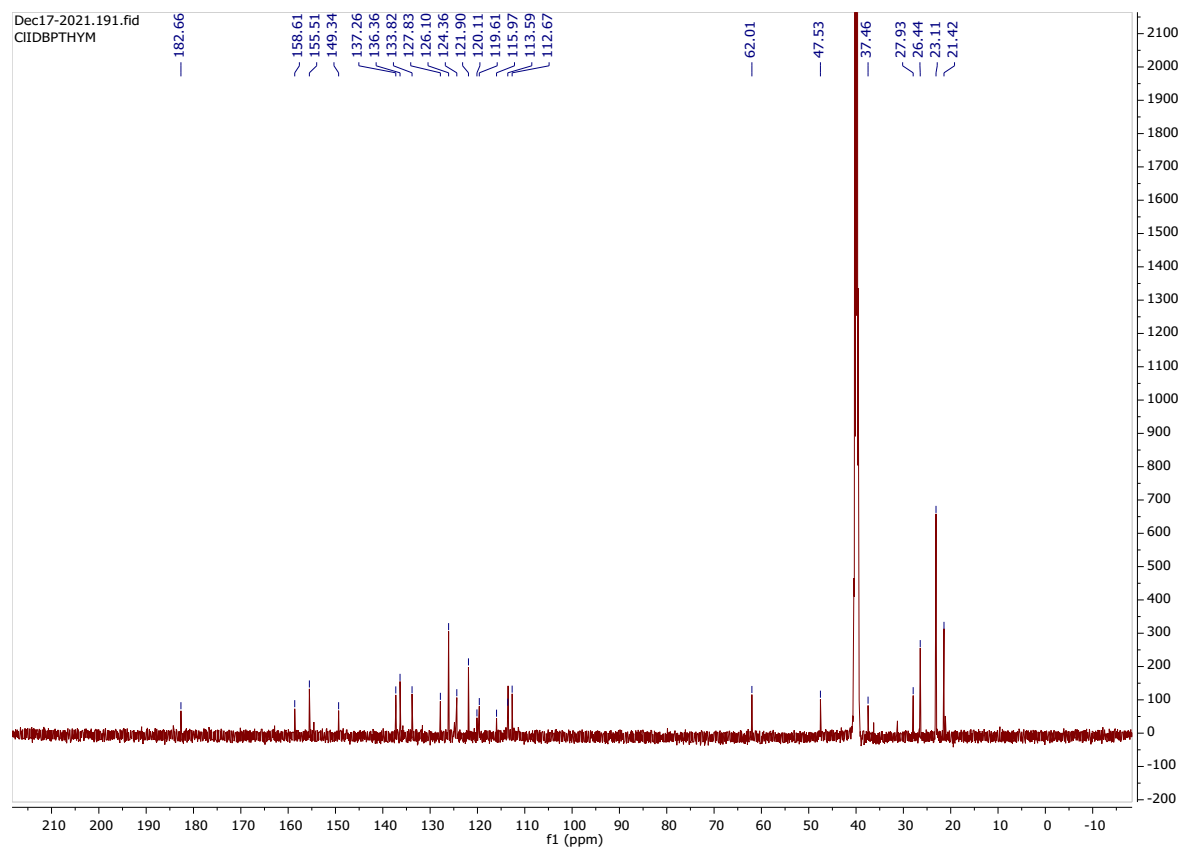

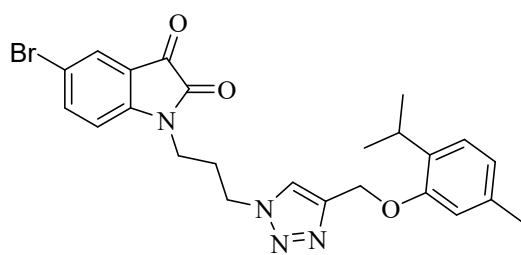

<sup>1</sup>H NMR spectrum of AS11

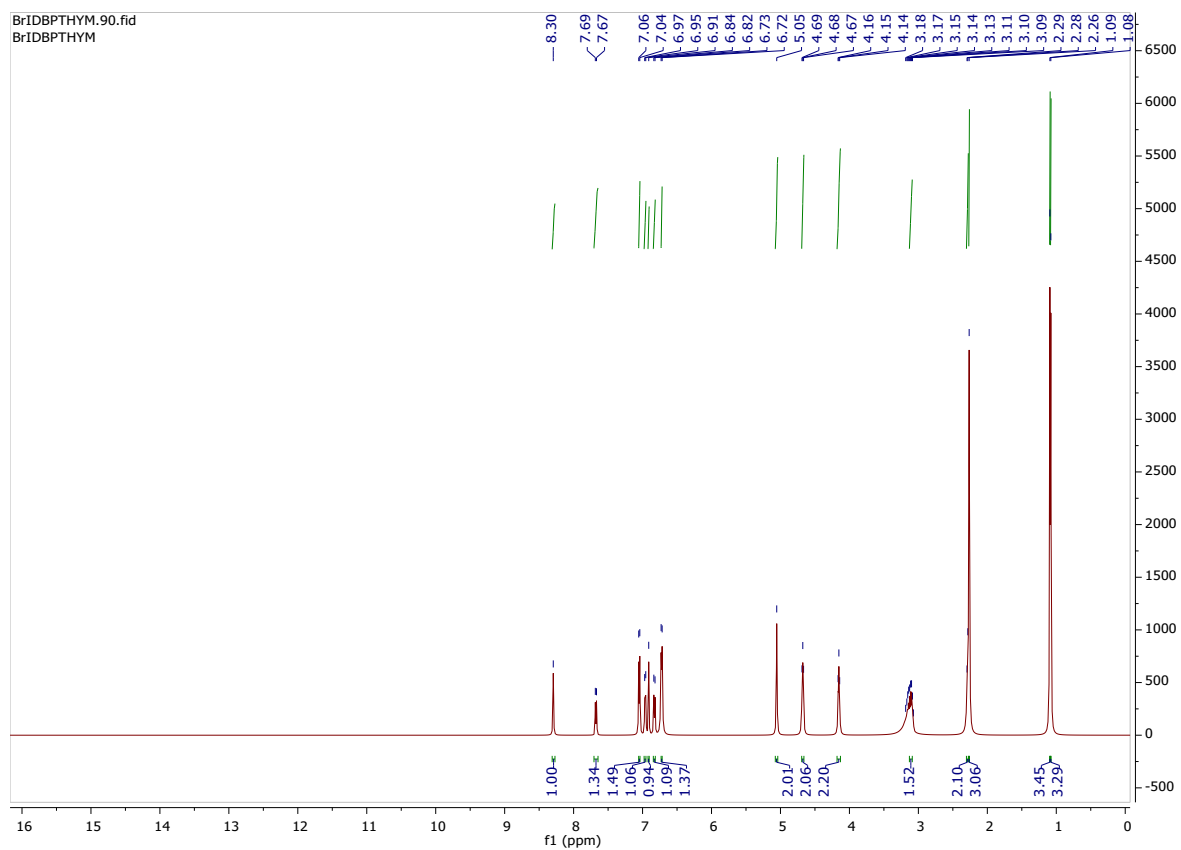

# <sup>13</sup>C NMR spectrum of AS11

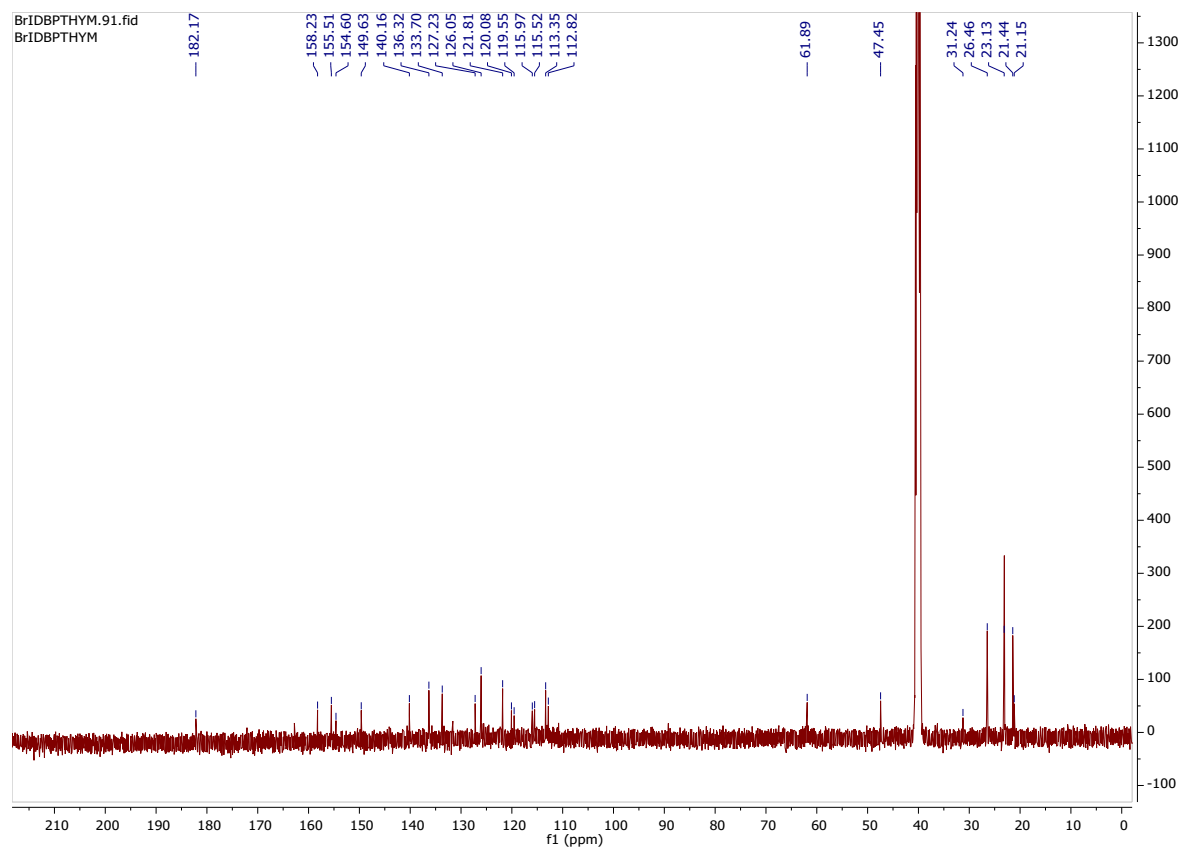

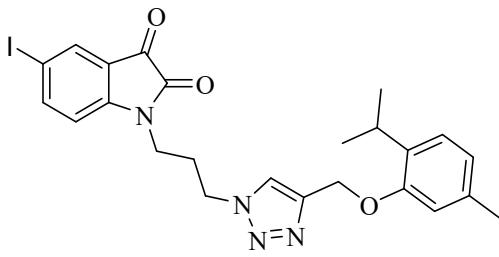

<sup>1</sup>H NMR spectrum of AS12

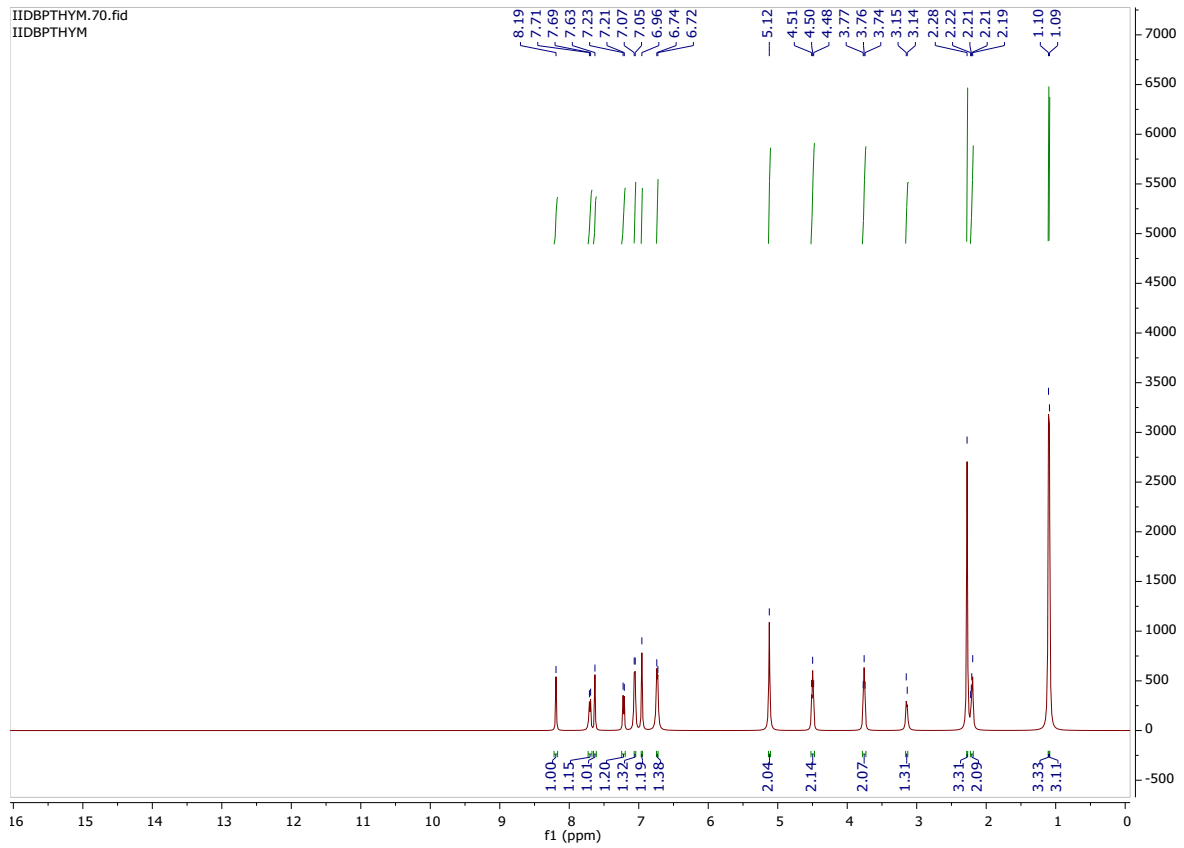

# <sup>13</sup>C NMR spectrum of AS12

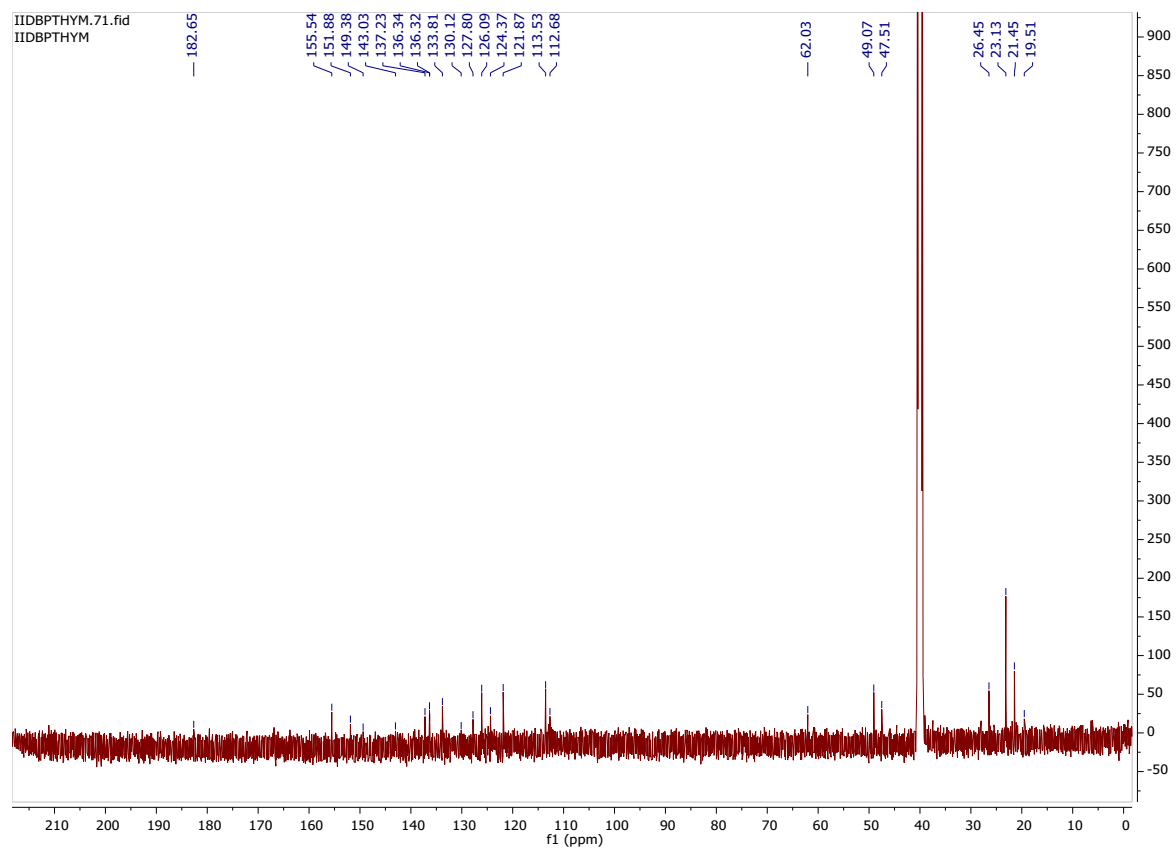

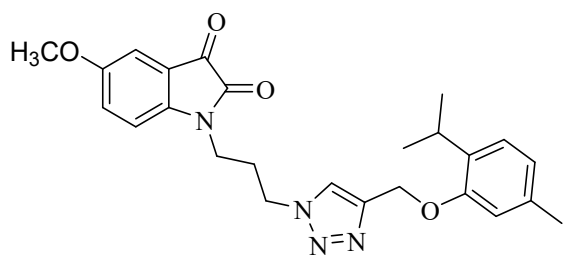

<sup>1</sup>H NMR spectrum of AS13

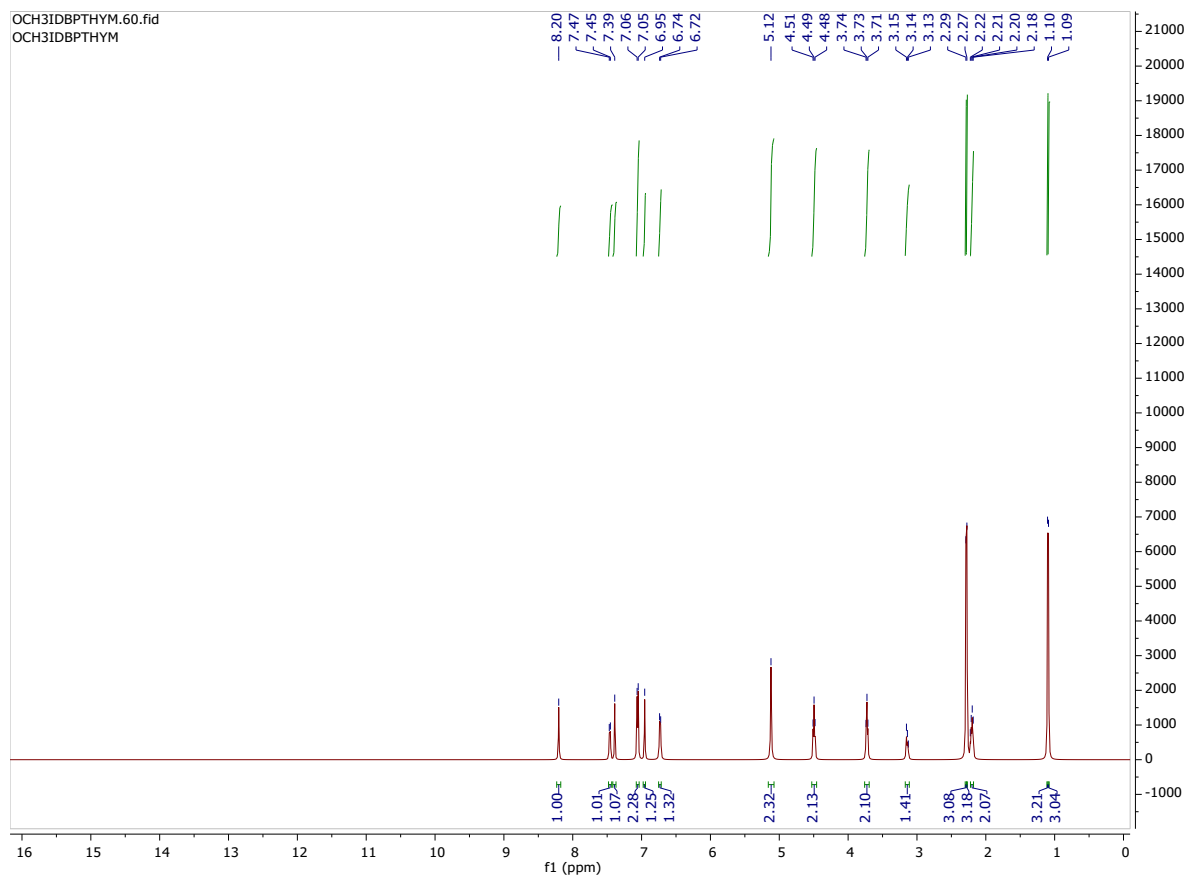

# <sup>13</sup>C NMR spectrum of AS13

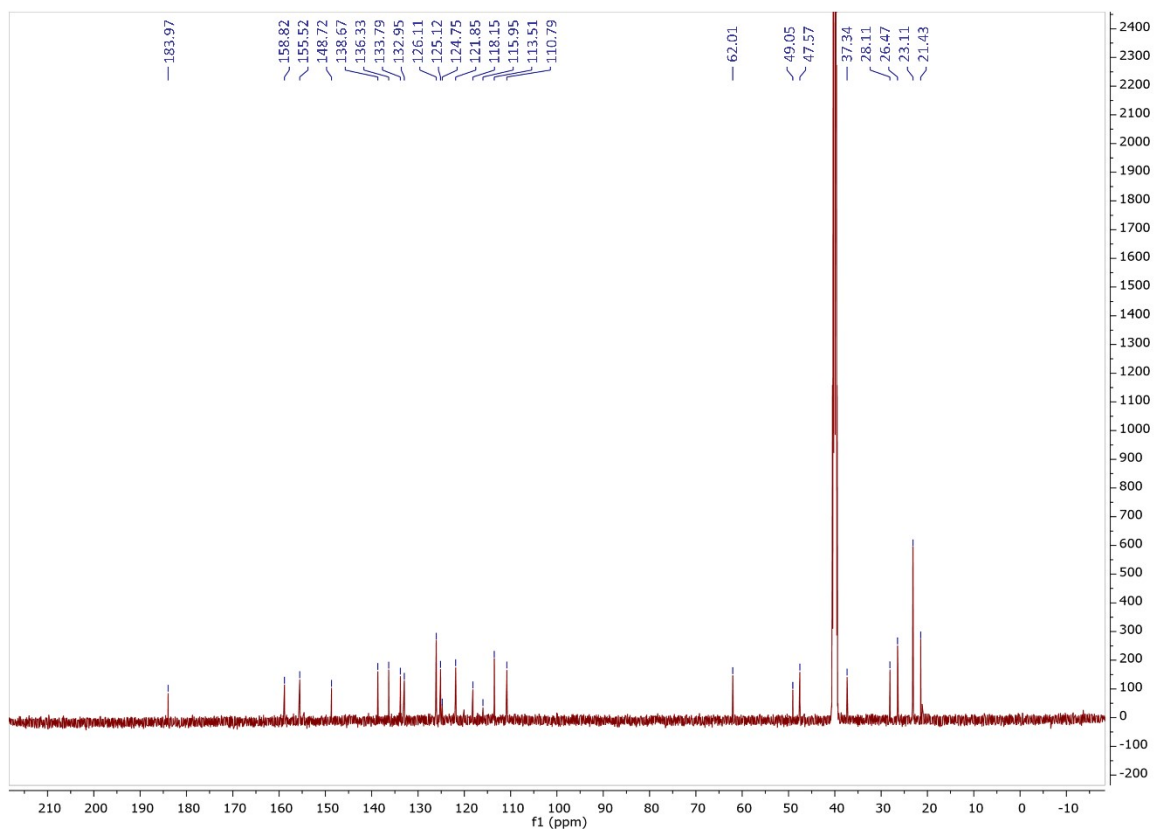



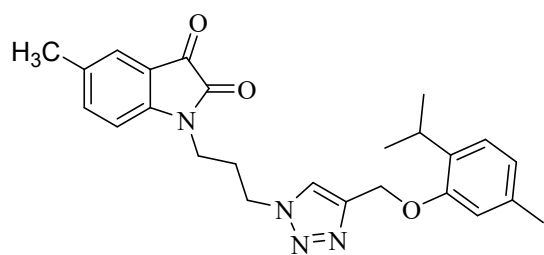

<sup>1</sup>H NMR spectrum of AS14

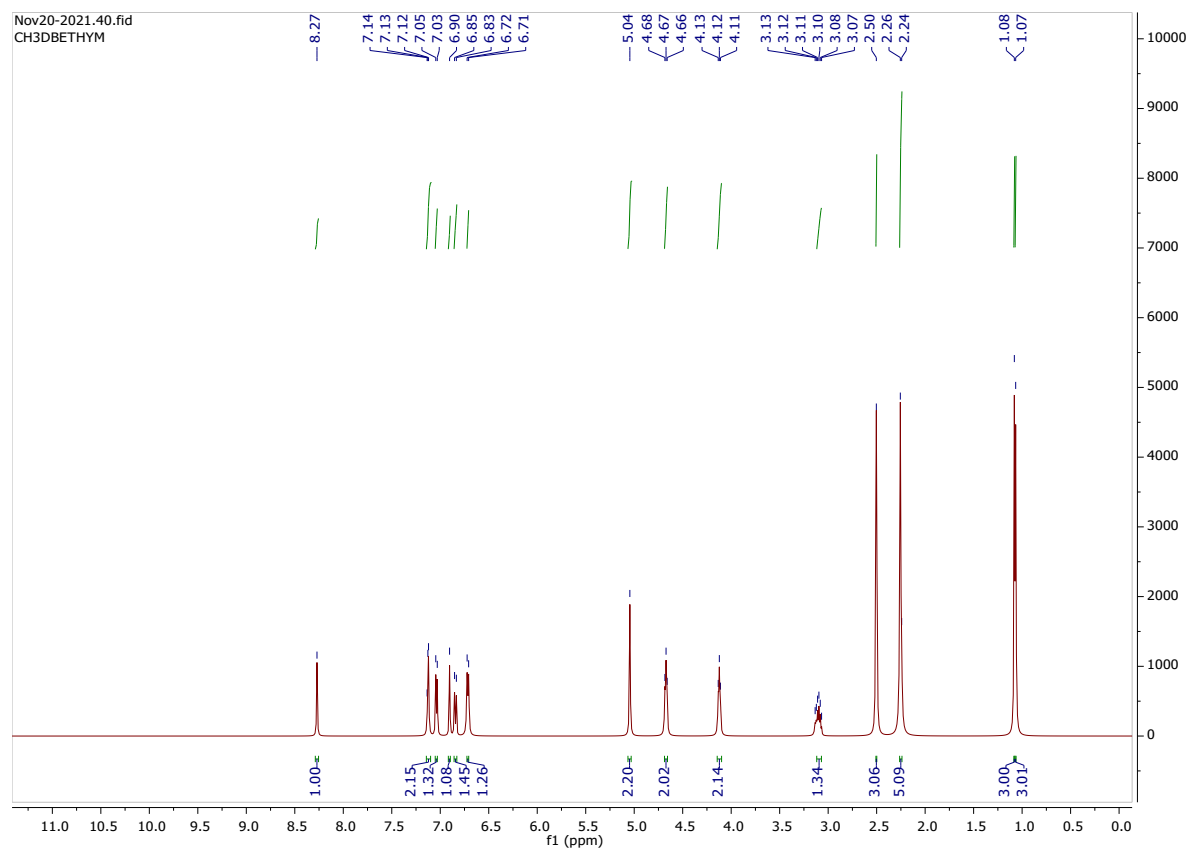

# <sup>13</sup>C NMR spectrum of AS14

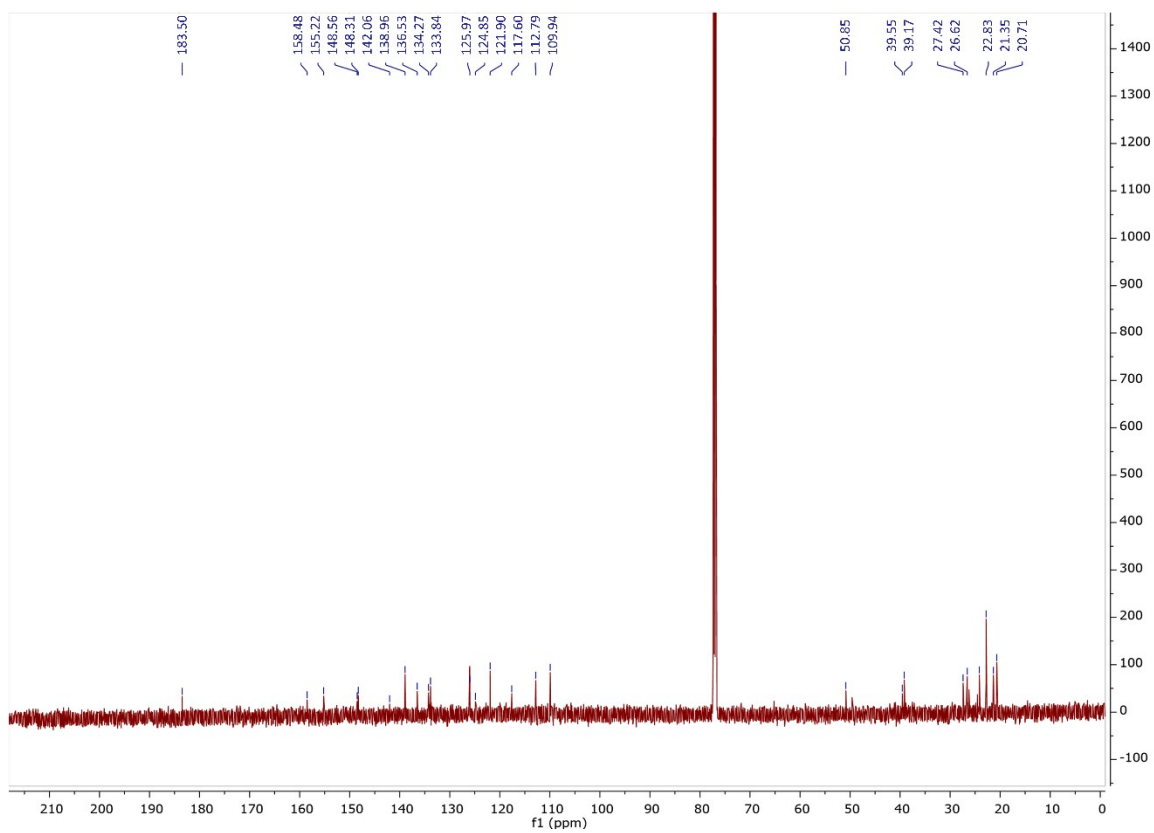

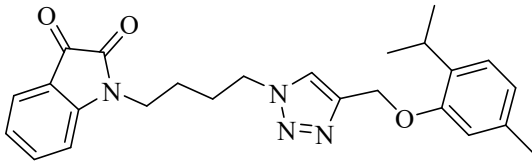

<sup>1</sup>H NMR spectrum of AS15

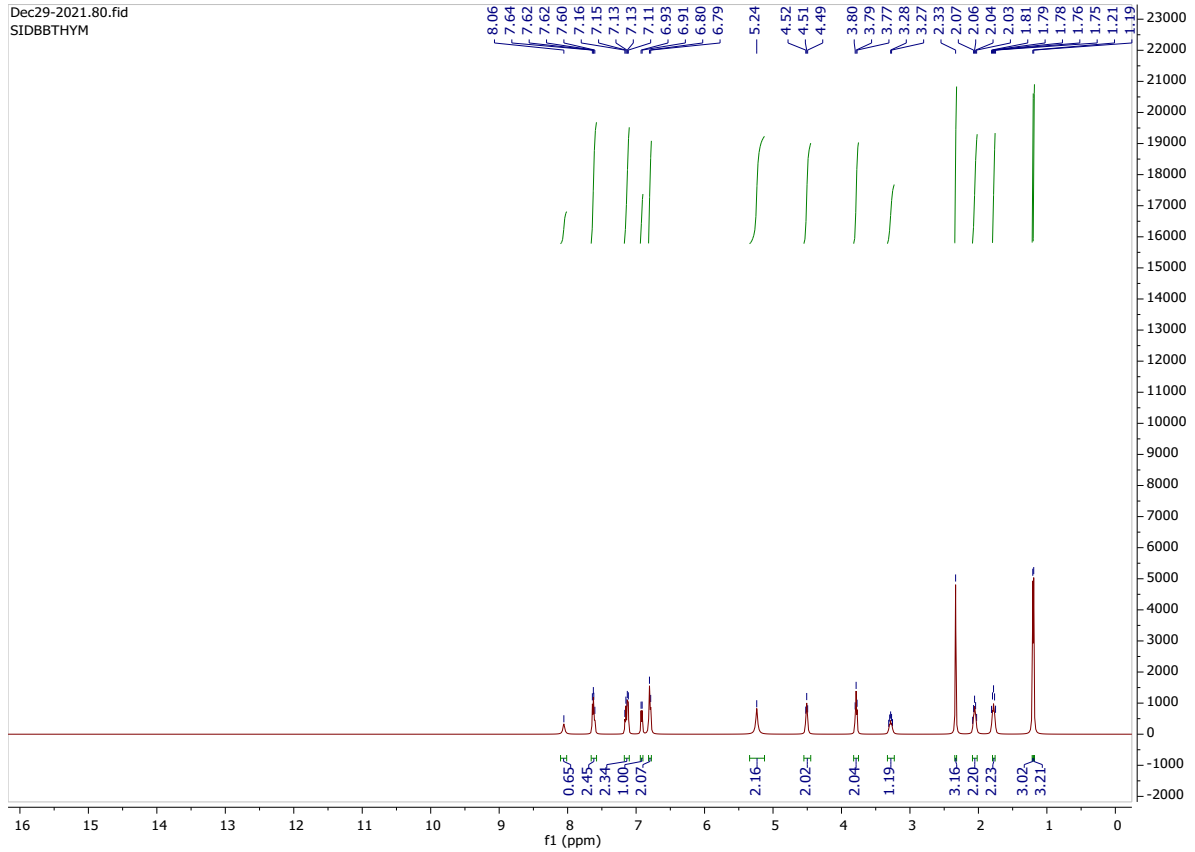

# <sup>13</sup>C NMR spectrum of AS15

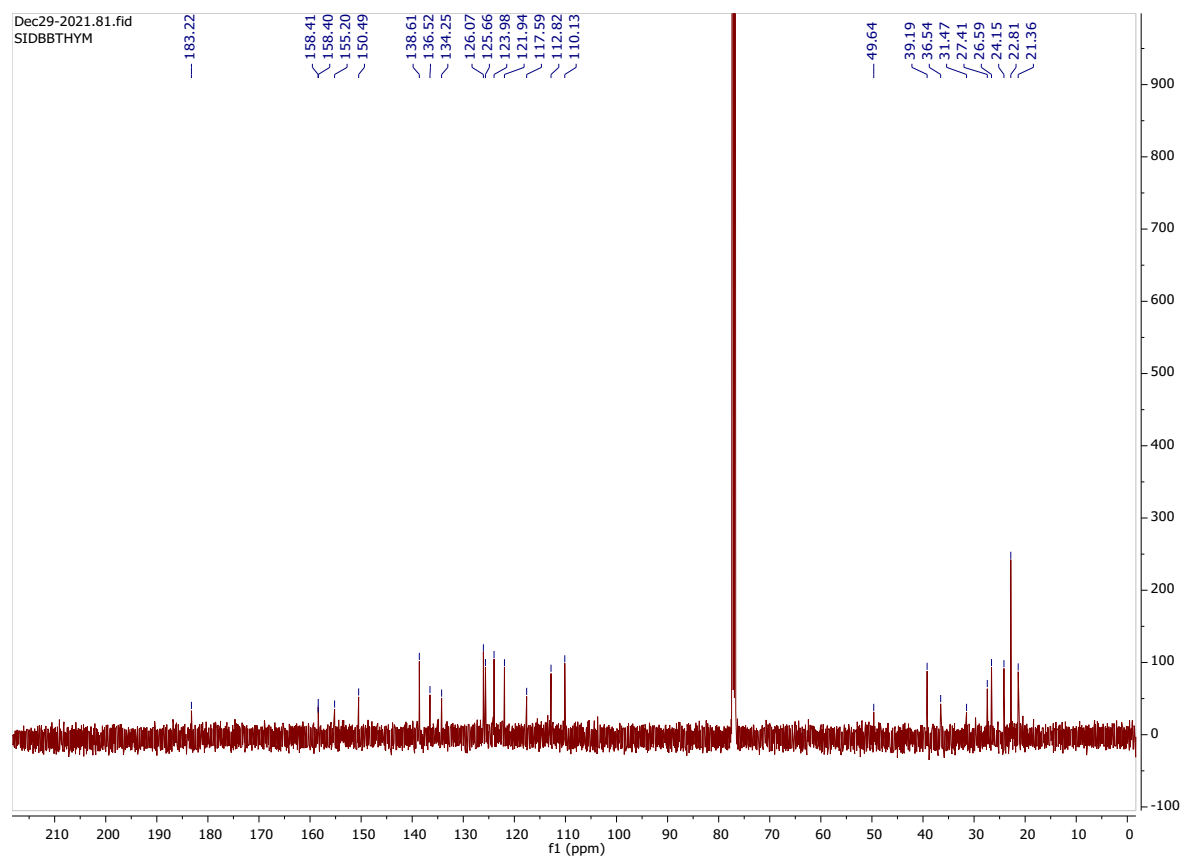

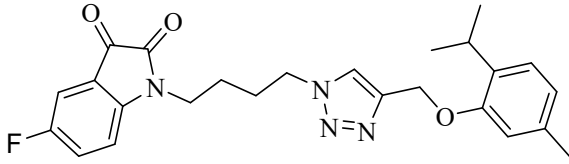

<sup>1</sup>H NMR spectrum of AS16

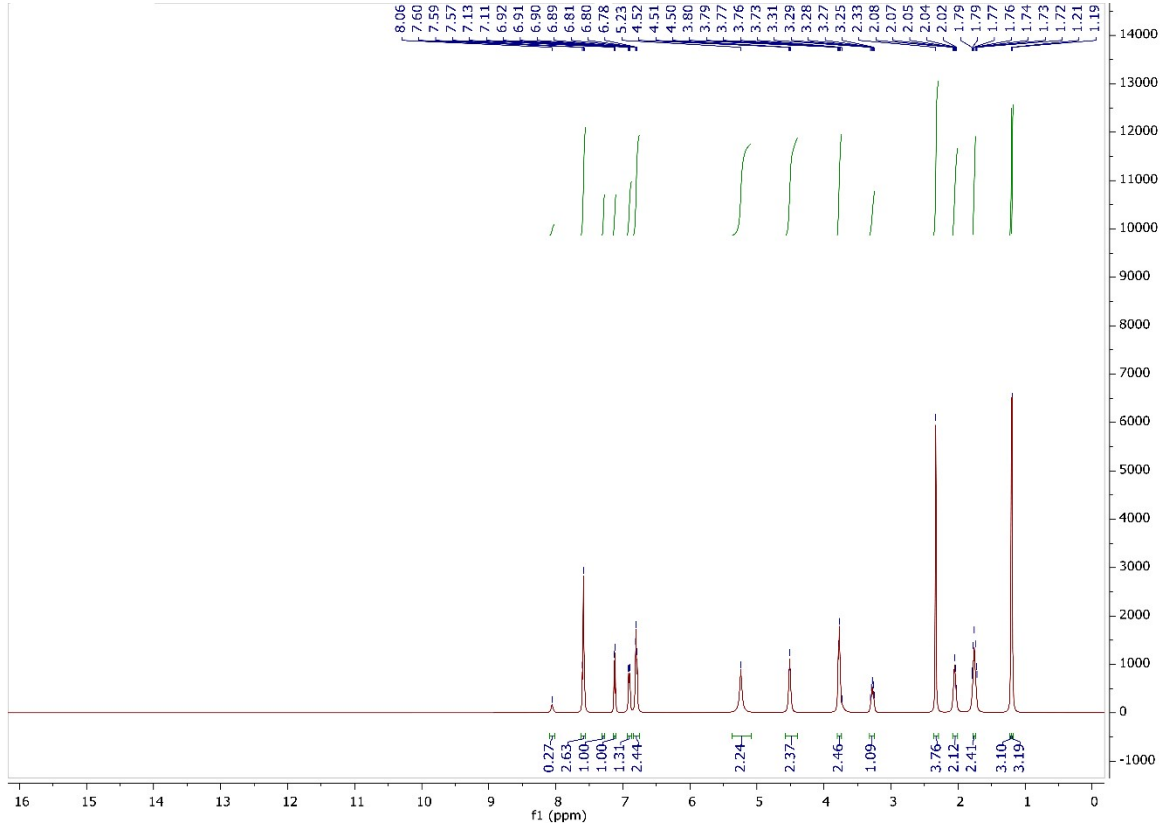

# $^{13}\text{C}$ NMR spectrum of AS16

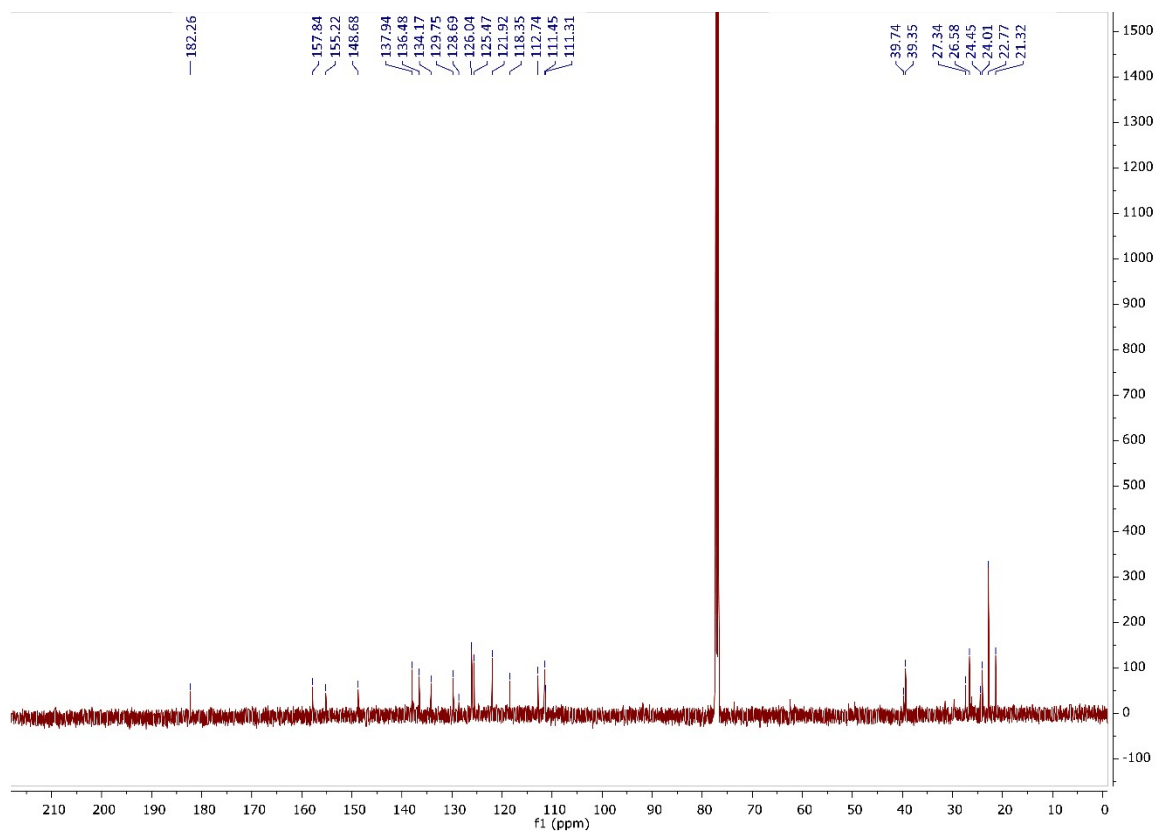

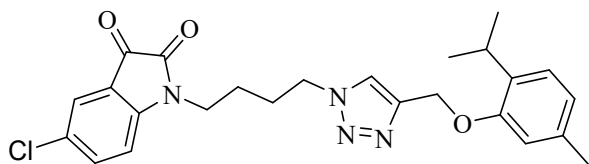

<sup>1</sup>H NMR spectrum of AS17

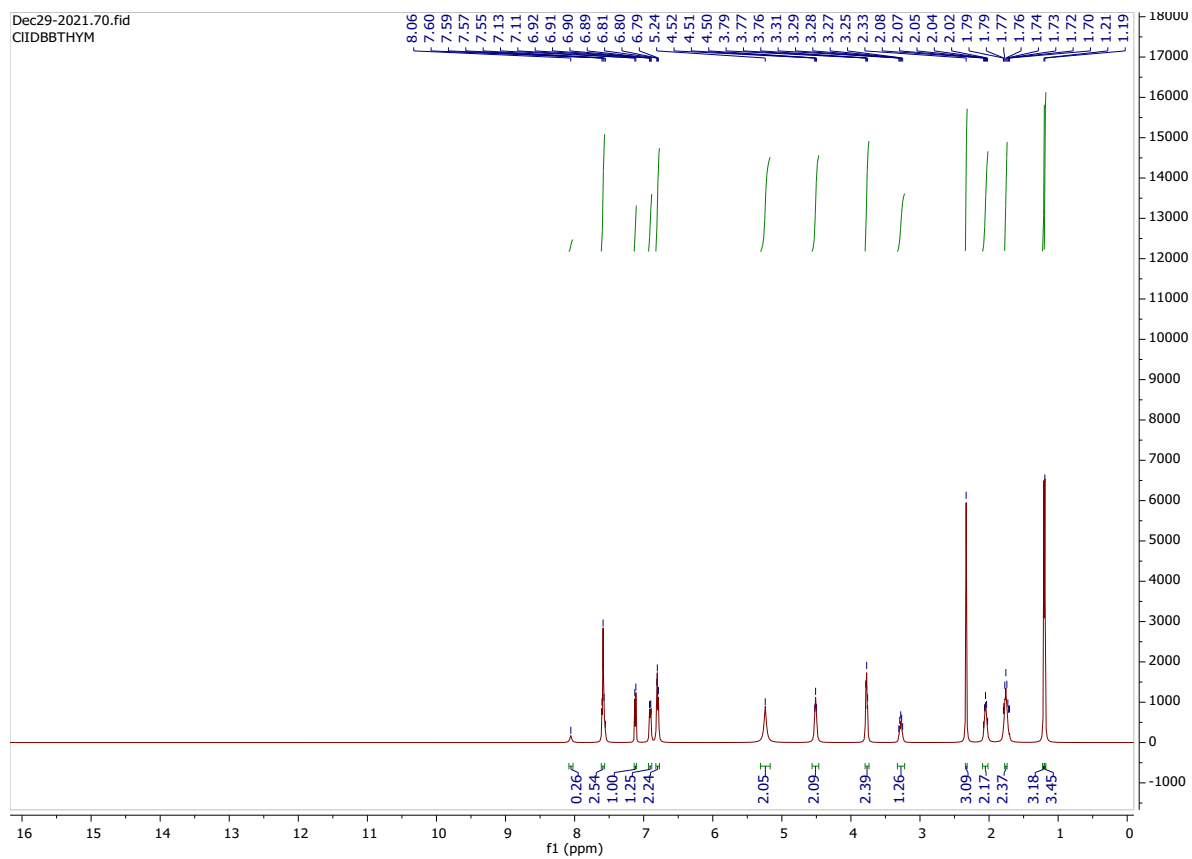

# <sup>13</sup>C NMR spectrum of AS17

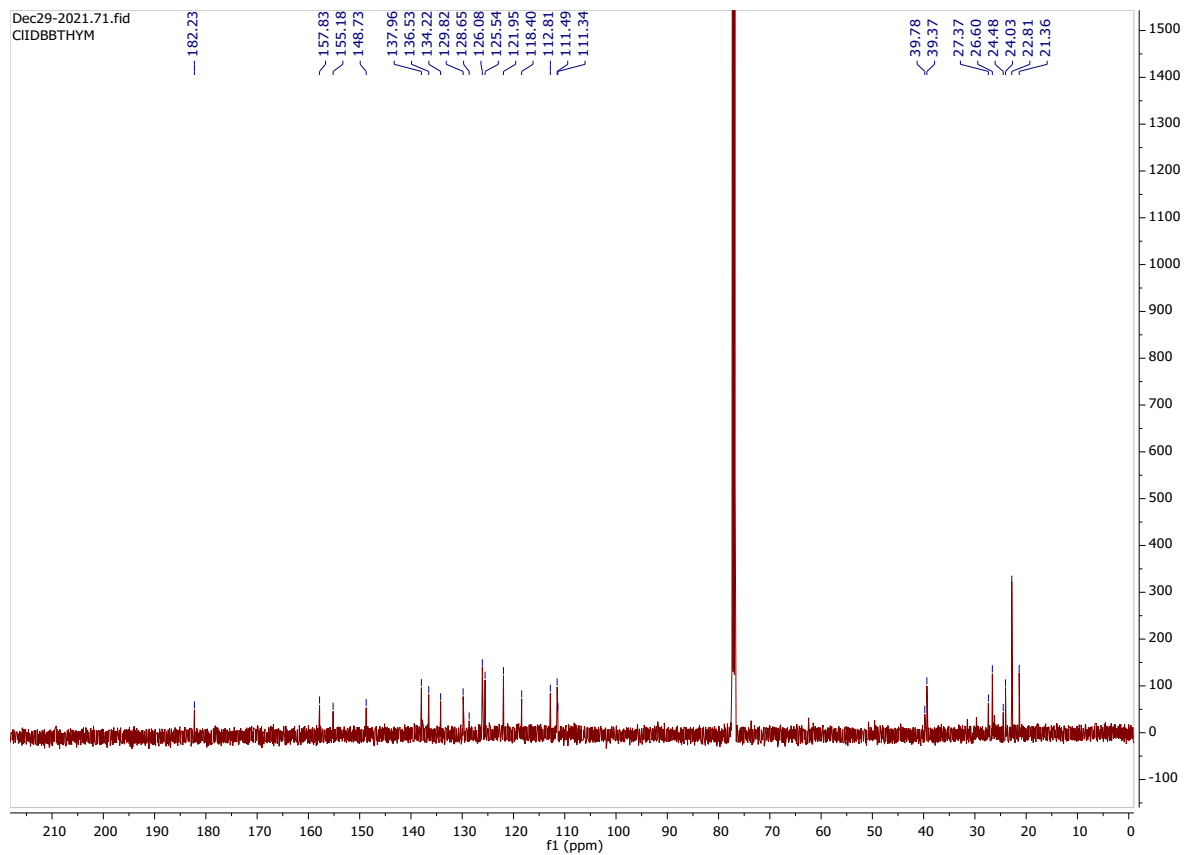



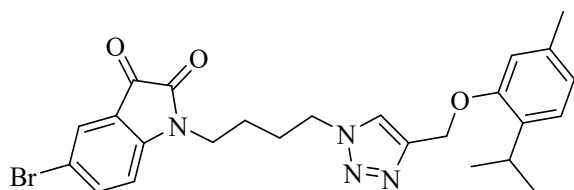

<sup>1</sup>H NMR spectrum of AS18

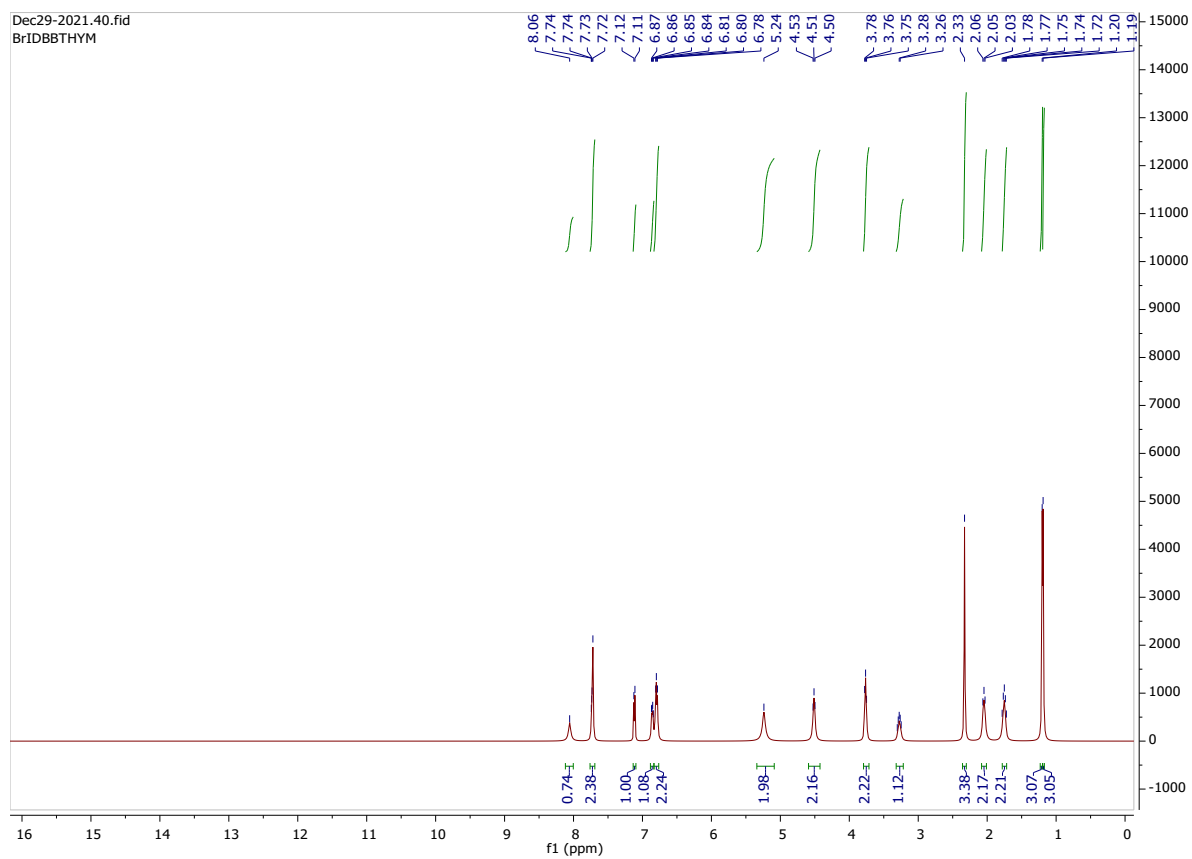

# <sup>13</sup>C NMR spectrum of AS18

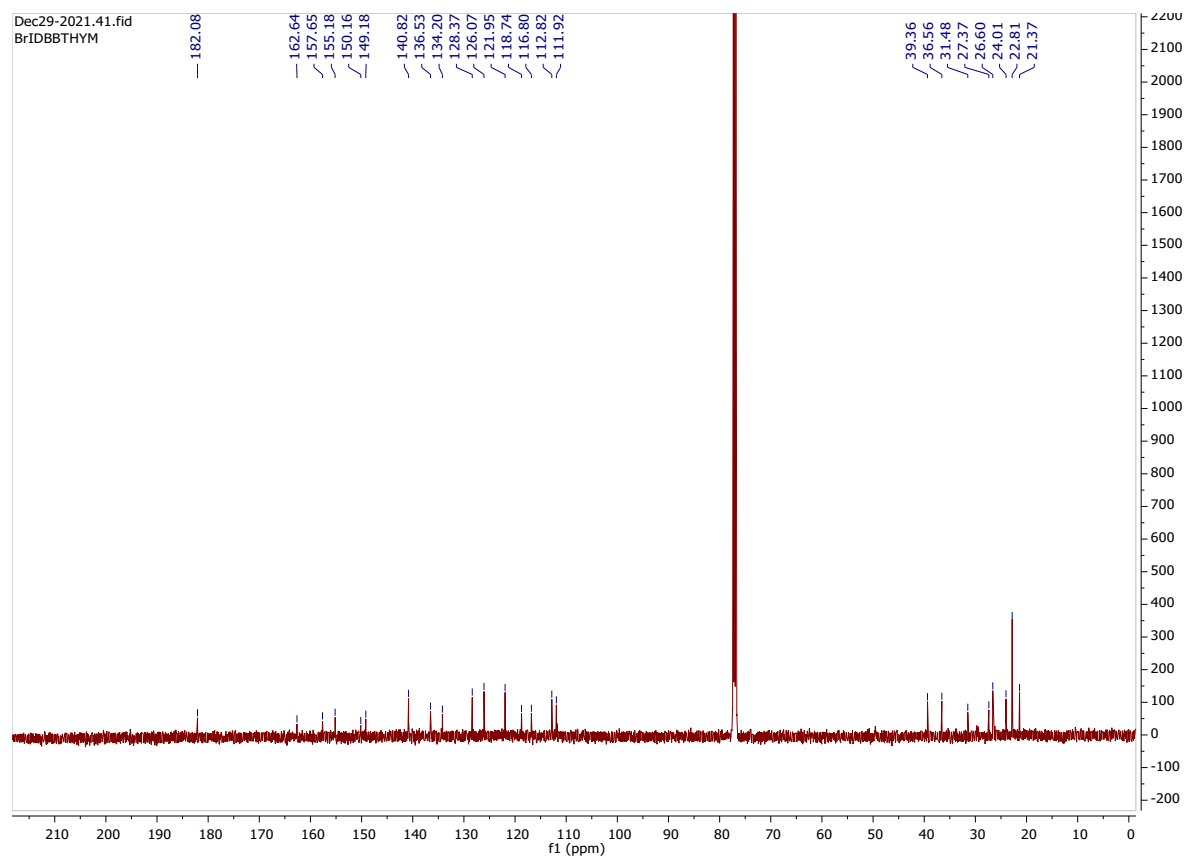

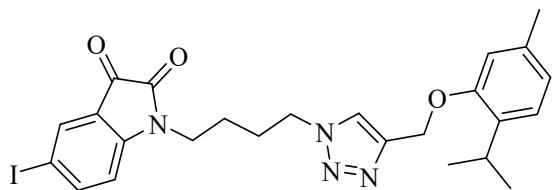

<sup>1</sup>H NMR spectrum of AS19

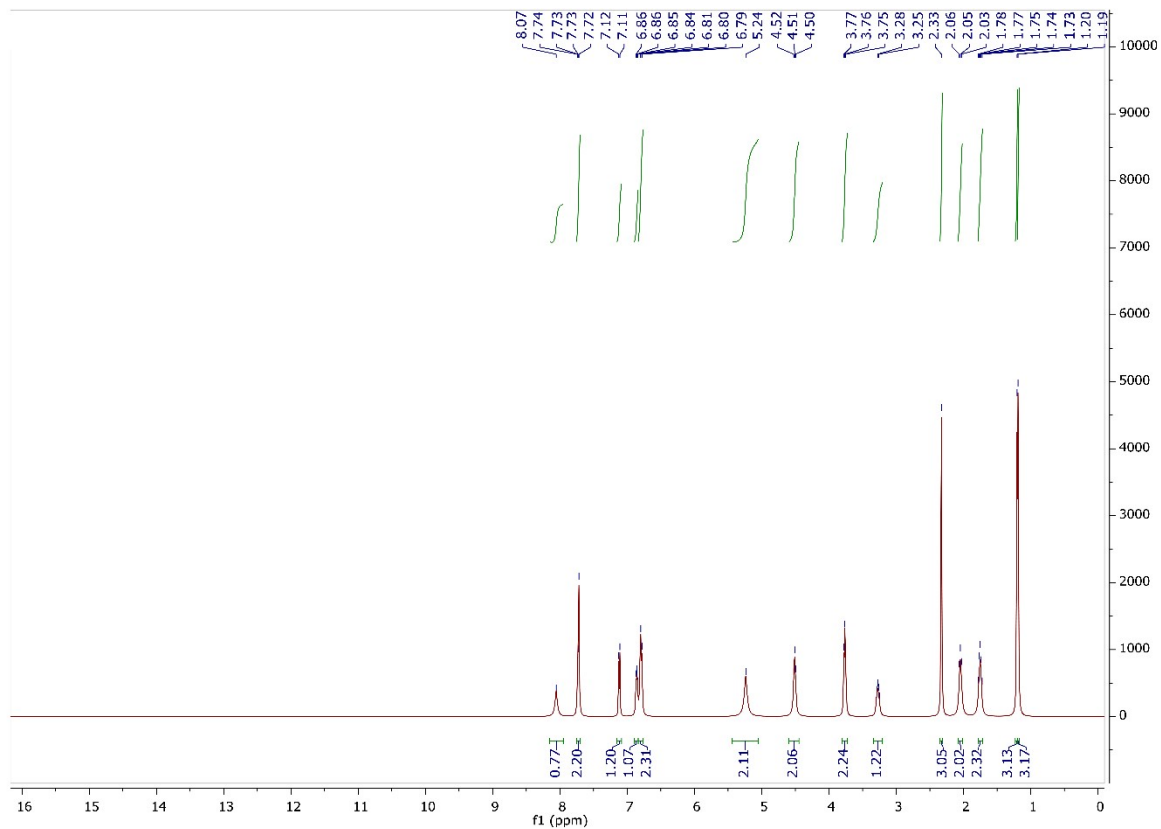

# $^{13}\text{C}$ NMR spectrum of AS19

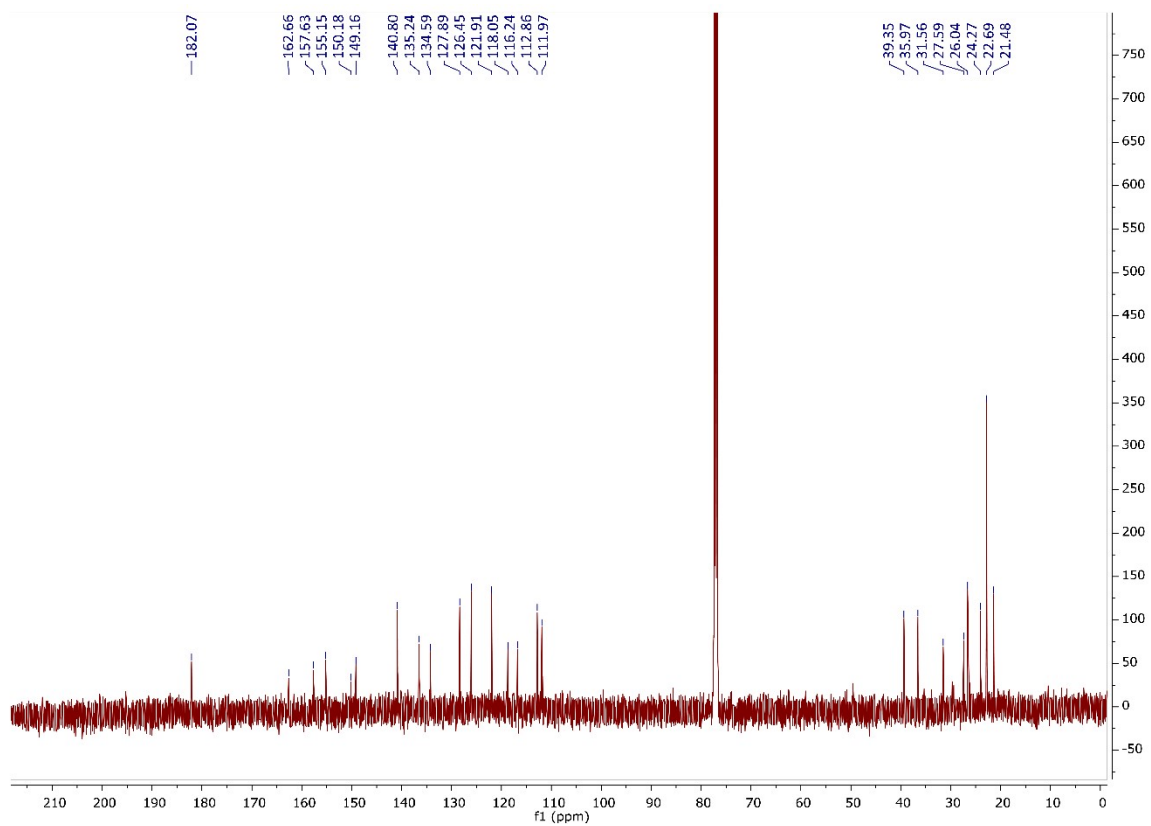

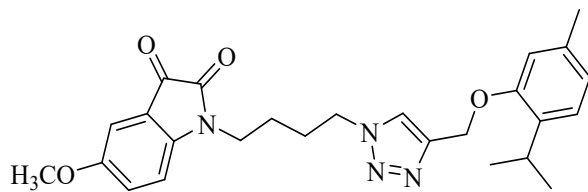

<sup>1</sup>H NMR spectrum of AS20

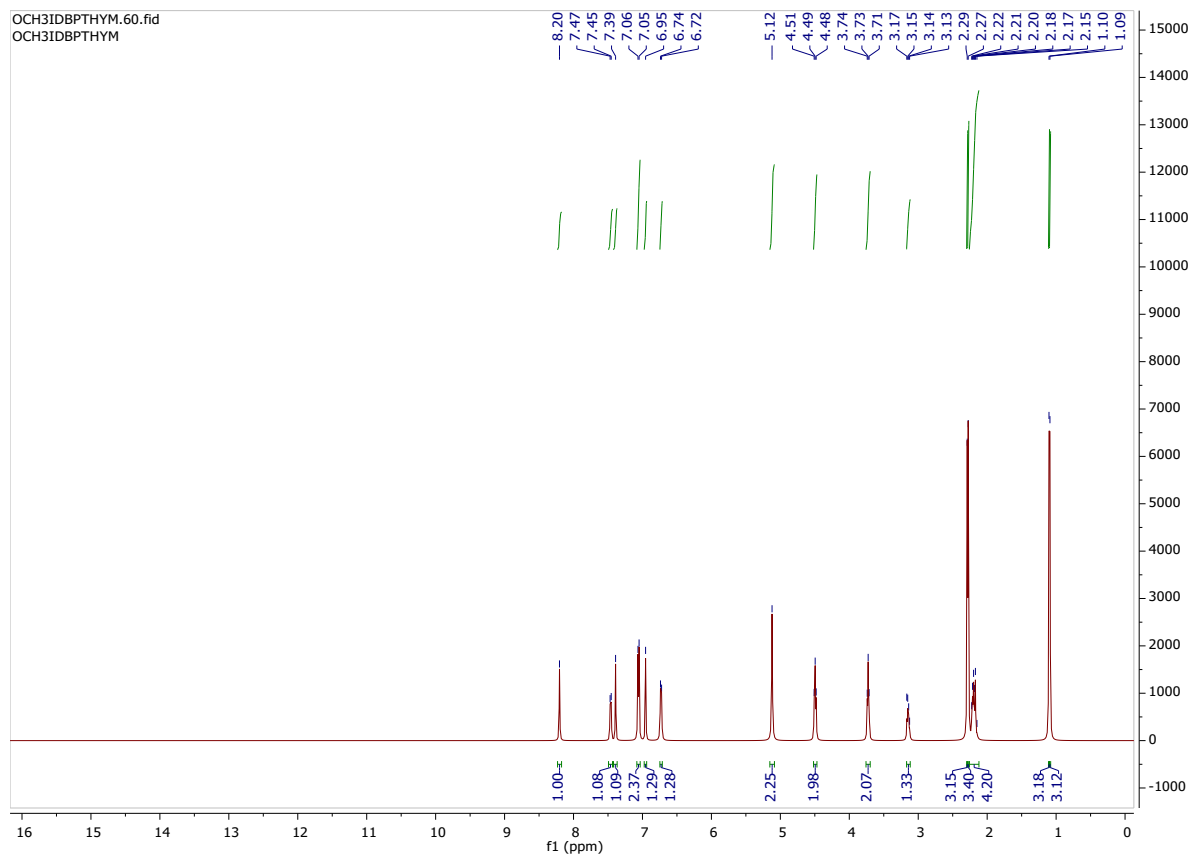

# <sup>13</sup>C NMR spectrum of AS20

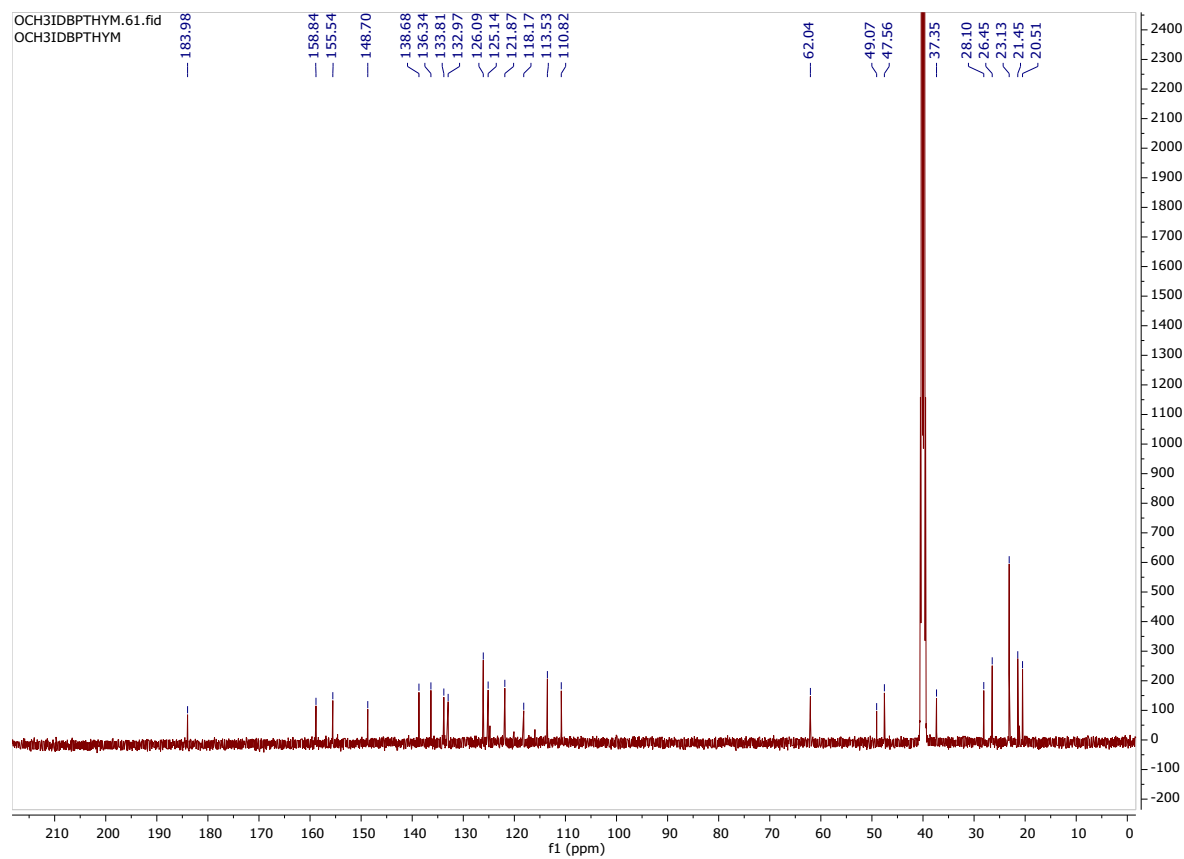

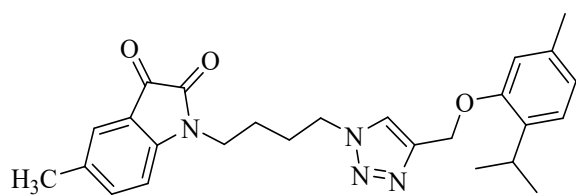

<sup>1</sup>H NMR spectrum of AS21

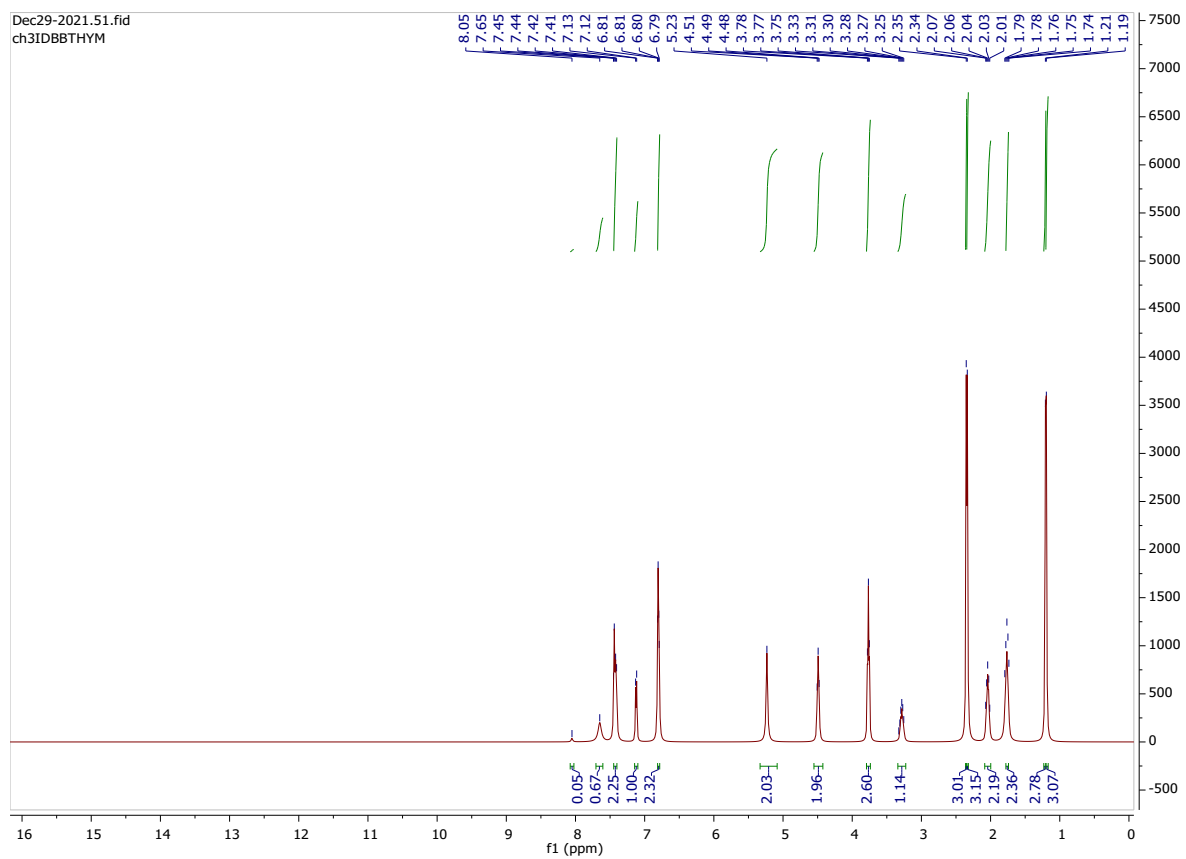

# $^{13}\text{C}$ NMR spectrum of AS21

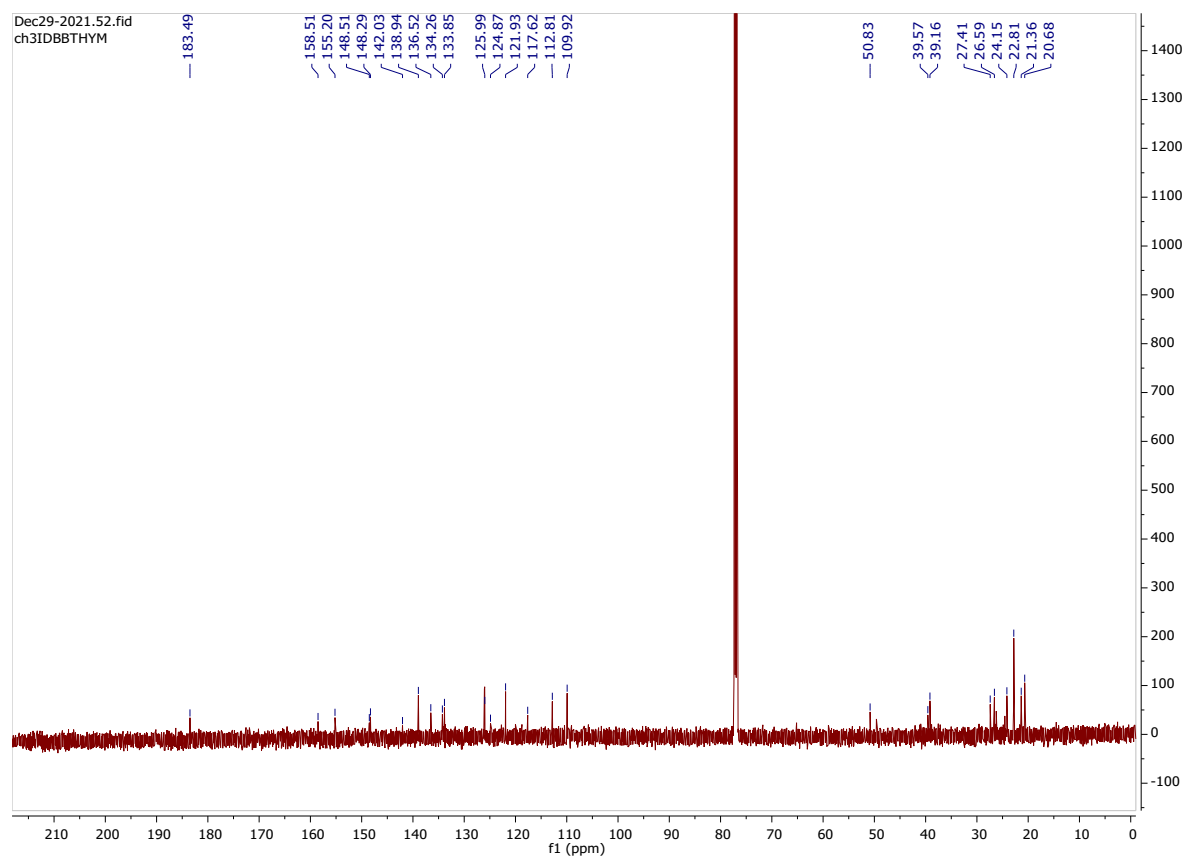

Supplement: d3md00580a1.pdf [file d3md00580a1.pdf]
